# Supplementary material
Source: PubMed Central journal article supplement (PMC4174951)
Supplement: 0cd65d81ea1c5c72b361f2e7da6a0e13_genetics.114.167155-10.pdf [file 0cd65d81ea1c5c72b361f2e7da6a0e13_genetics.114.167155-10.pdf]

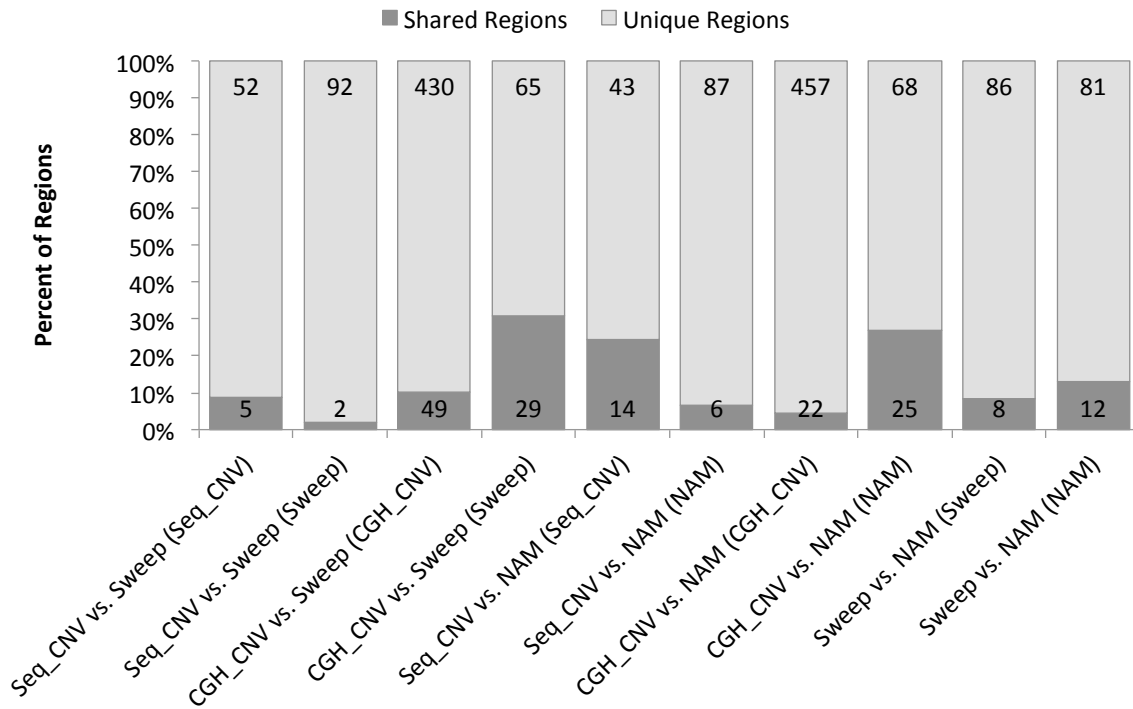

**Figure S8** Pair-wise comparisons of overlapping variable regions in the Krug Yellow Dent divergent long-term selection experiment for seed size and quantitative trait loci for seed weight in the maize nested association (NAM) population. Type of variation in parenthesis following the pair-wise comparison description indicates which type of variation the bar pertains to. A comparison with NAM SNPs required regions to be within 500kb to be considered shared regions and for all other comparisons 10kb overlap was required.
