# Supplementary material
Source: PubMed Central journal article supplement (PMC4174951)
Supplement: 3fb9d4dce4c8d7170f7427ea09050d1d_genetics.114.167155-8.pdf [file 3fb9d4dce4c8d7170f7427ea09050d1d_genetics.114.167155-8.pdf]

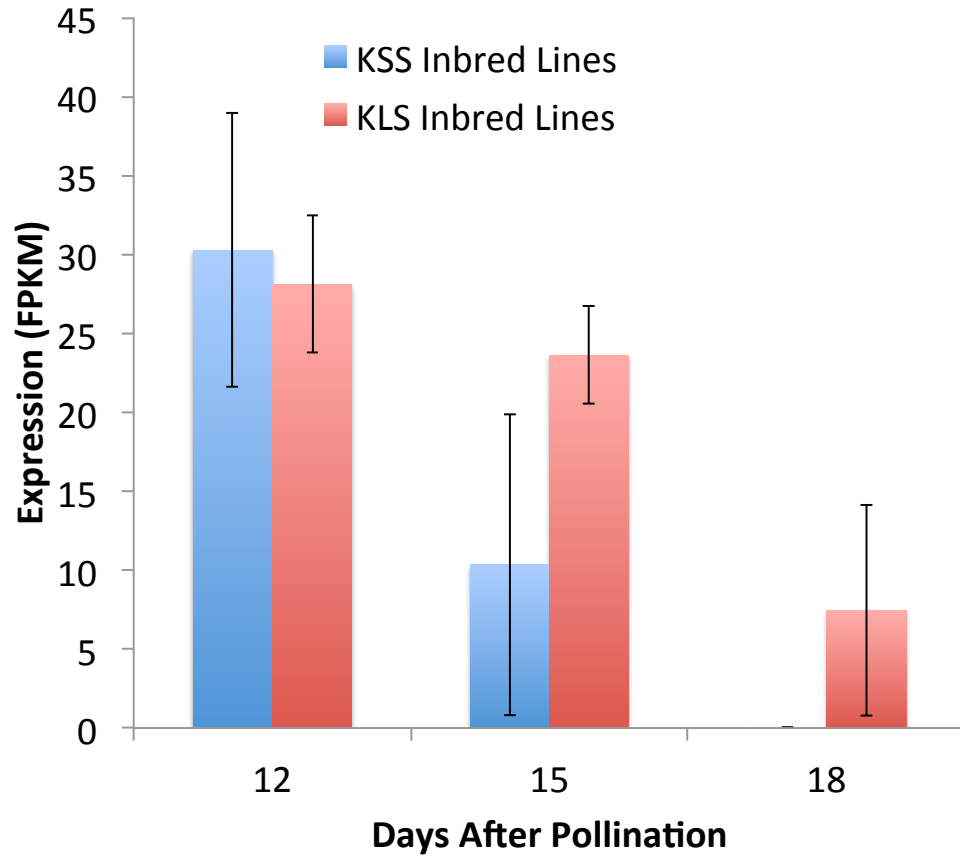

**Figure S5** Average endosperm transcript abundance estimates for inbred lines derived from the KSS\_30 and KLS\_30 populations for the gene GRMZM2G069078. Error bars show standard deviations calculated from three biological replicates. Data for this figure was obtained from (SEKHON *et al.* 2014)
