# Supplementary material
Source: PubMed Central journal article supplement (PMC4174951)
Supplement: 9bac2a57259d7ca158e554260772f844_genetics.114.167155-14.pdf [file 9bac2a57259d7ca158e554260772f844_genetics.114.167155-14.pdf]

**Table S5 Regions with copy number variation (CNV) between KLS\_30 and KSS\_30 based on read depth variation.** Average read depth was determined in 5kb windows in both populations. CNV windows were defined as having an absolute value greater than 2 for the number of standard deviations (SD) away from the mean in KLS\_30 minus the number of standard deviations away from the mean in KSS\_30.

| Chr | Region Start | Region Stop | Krug Yellow<br>Dent SD From<br>Mean | KLS_30<br>SD from<br>Mean | KSS_30 SD<br>From<br>Mean | Absolute Value of<br>KLS_30 SD Minus<br>KSS_30 SD |
|-----|--------------|-------------|-------------------------------------|---------------------------|---------------------------|---------------------------------------------------|
| 1   | 235001       | 240000      | 6.20                                | 3.54                      | 5.81                      | 2.27                                              |
| 1   | 203910001    | 203915000   | 32.13                               | 36.10                     | 29.50                     | 6.60                                              |
| 1   | 234470001    | 234475000   | 9.85                                | 6.52                      | 8.83                      | 2.31                                              |
| 1   | 234500001    | 234505000   | 8.74                                | 5.46                      | 8.02                      | 2.56                                              |
| 1   | 234510001    | 234515000   | 10.74                               | 6.57                      | 9.38                      | 2.81                                              |
| 1   | 234525001    | 234530000   | 6.38                                | 3.88                      | 6.34                      | 2.46                                              |
| 1   | 234545001    | 234550000   | 2.00                                | 7.27                      | 0.28                      | 6.99                                              |
| 1   | 234605001    | 234610000   | 19.13                               | 13.87                     | 16.02                     | 2.15                                              |
| 1   | 234640001    | 234645000   | 11.68                               | 6.30                      | 10.07                     | 3.76                                              |
| 1   | 234645001    | 234650000   | 23.55                               | 10.47                     | 20.49                     | 10.02                                             |
| 1   | 234650001    | 234655000   | 4.62                                | 1.99                      | 4.03                      | 2.04                                              |
| 1   | 234720001    | 234725000   | 30.96                               | 17.98                     | 26.04                     | 8.05                                              |
| 1   | 234725001    | 234730000   | 32.95                               | 19.19                     | 27.93                     | 8.74                                              |
| 1   | 234730001    | 234735000   | 26.88                               | 15.52                     | 22.49                     | 6.97                                              |
| 1   | 234735001    | 234740000   | 22.14                               | 13.38                     | 18.65                     | 5.27                                              |
| 2   | 65000001     | 65005000    | 9.96                                | 11.93                     | 9.33                      | 2.60                                              |
| 2   | 77820001     | 77825000    | 9.52                                | 5.09                      | 8.19                      | 3.10                                              |
| 2   | 77825001     | 77830000    | 20.88                               | 9.50                      | 18.85                     | 9.35                                              |
| 2   | 77865001     | 77870000    | 8.97                                | 5.59                      | 7.65                      | 2.06                                              |
| 2   | 77870001     | 77875000    | 24.74                               | 16.35                     | 22.08                     | 5.73                                              |
| 2   | 77875001     | 77880000    | 30.42                               | 18.85                     | 26.10                     | 7.25                                              |
| 2   | 77880001     | 77885000    | 13.41                               | 7.95                      | 11.53                     | 3.57                                              |
| 2   | 172080001    | 172085000   | 31.16                               | 35.19                     | 31.35                     | 3.84                                              |
| 2   | 172085001    | 172090000   | 14.78                               | 9.31                      | 14.01                     | 4.70                                              |
| 2   | 172110001    | 172115000   | 26.79                               | 30.90                     | 25.12                     | 5.78                                              |
| 2   | 172115001    | 172120000   | 53.85                               | 60.10                     | 51.33                     | 8.77                                              |
| 2   | 174415001    | 174420000   | 1.82                                | 5.69                      | -0.06                     | 5.74                                              |
| 3   | 74660001     | 74665000    | 11.29                               | 4.59                      | 9.86                      | 5.27                                              |
| 3   | 209600001    | 209605000   | 5.97                                | 4.05                      | 6.10                      | 2.05                                              |
| 4   | 111670001    | 111675000   | 2.75                                | 9.63                      | 0.53                      | 9.10                                              |
| 4   | 172415001    | 172420000   | 9.54                                | 6.01                      | 9.02                      | 3.01                                              |
| 5   | 189240001    | 189245000   | 7.91                                | 4.43                      | 6.65                      | 2.22                                              |
| 5   | 209940001    | 209945000   | 23.61                               | 24.51                     | 20.82                     | 3.69                                              |
| 5   | 209945001    | 209950000   | 22.73                               | 24.76                     | 19.44                     | 5.32                                              |
| 5   | 209960001    | 209965000   | 3.94                                | 5.56                      | -0.32                     | 5.88                                              |
| 5   | 209990001    | 209995000   | 19.42                               | 22.00                     | 18.48                     | 3.52                                              |
| 5   | 210290001    | 210295000   | 4.68                                | 6.30                      | 4.11                      | 2.18                                              |

|    |           |           |       |       |       |      |
|----|-----------|-----------|-------|-------|-------|------|
| 6  | 20610001  | 20615000  | 7.53  | 6.25  | 8.27  | 2.02 |
| 6  | 60760001  | 60765000  | 9.35  | 11.79 | 8.53  | 3.26 |
| 6  | 104230001 | 104235000 | 17.50 | 12.94 | 16.65 | 3.71 |
| 6  | 160755001 | 160760000 | 10.34 | 7.23  | 9.34  | 2.11 |
| 6  | 160765001 | 160770000 | 68.65 | 72.54 | 63.99 | 8.55 |
| 6  | 160770001 | 160775000 | 33.42 | 27.46 | 30.52 | 3.06 |
| 6  | 160785001 | 160790000 | 12.43 | 5.81  | 11.82 | 6.01 |
| 7  | 18050001  | 18055000  | 9.32  | 11.19 | 8.66  | 2.53 |
| 7  | 44725001  | 44730000  | 25.12 | 29.51 | 22.88 | 6.63 |
| 8  | 80365001  | 80370000  | 8.94  | 5.13  | 8.89  | 3.75 |
| 8  | 97340001  | 97345000  | 1.68  | 1.18  | 3.21  | 2.03 |
| 8  | 97350001  | 97355000  | 2.11  | 1.61  | 3.85  | 2.23 |
| 8  | 146460001 | 146465000 | 9.07  | 10.99 | 8.45  | 2.54 |
| 9  | 6950001   | 6955000   | 21.67 | 14.18 | 17.76 | 3.58 |
| 9  | 6955001   | 6960000   | 17.92 | 11.16 | 15.19 | 4.03 |
| 9  | 57980001  | 57985000  | 11.86 | 5.65  | 10.62 | 4.97 |
| 9  | 67980001  | 67985000  | 14.12 | 9.01  | 12.19 | 3.18 |
| 9  | 68025001  | 68030000  | 19.43 | 13.21 | 17.14 | 3.93 |
| 10 | 34105001  | 34110000  | 27.75 | 13.75 | 22.70 | 8.95 |
| 10 | 121000001 | 121005000 | 16.96 | 10.89 | 15.30 | 4.41 |

---
