# Supplementary material
Source: PubMed Central journal article supplement (PMC4174951)
Supplement: 11a4b2116de7253e784ccd24499ab898_genetics.114.167155-1.pdf [file 11a4b2116de7253e784ccd24499ab898_genetics.114.167155-1.pdf]

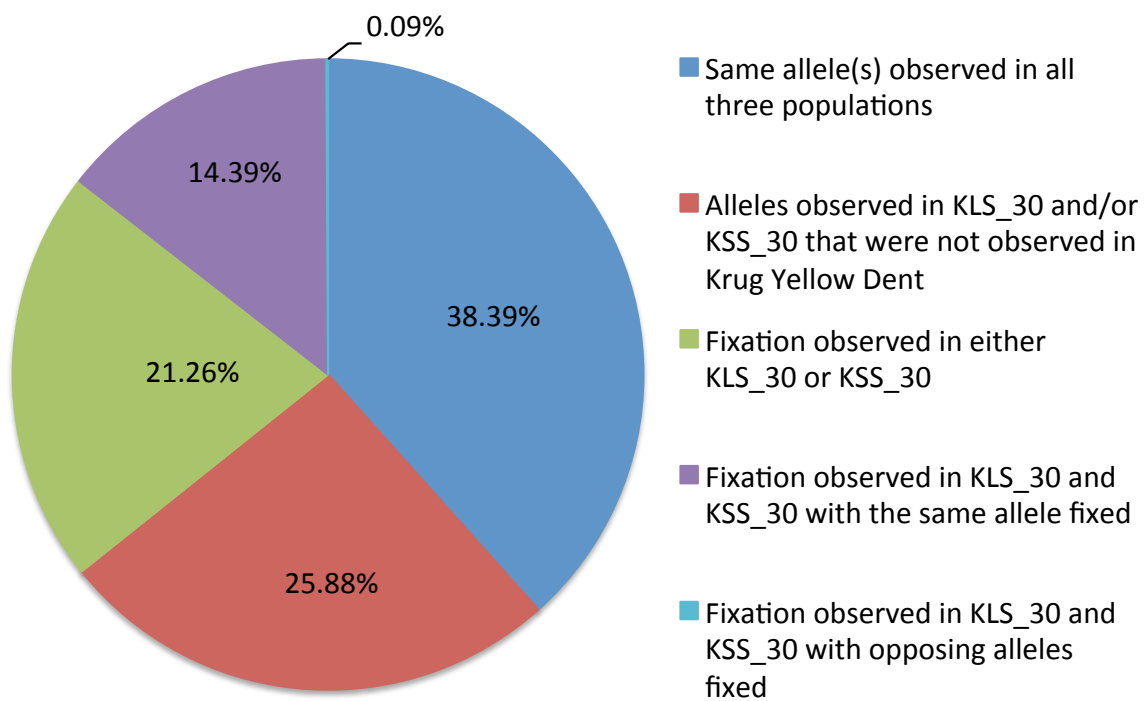

**Figure S1** Categorization of single nucleotide polymorphism (SNP) variants within the populations Krug Yellow Dent, KLS\_30, and KSS\_30.

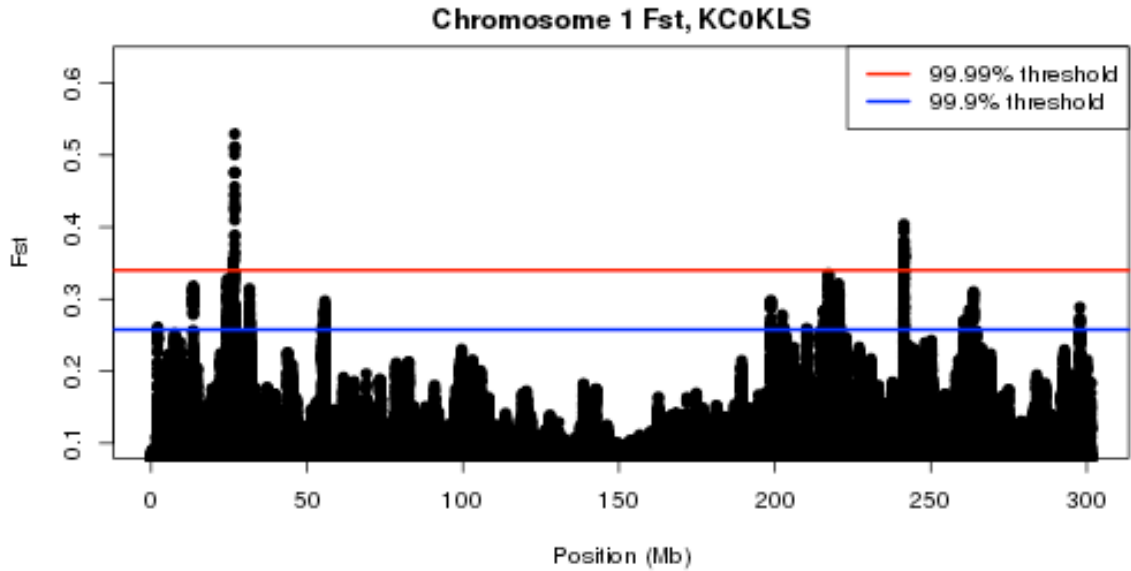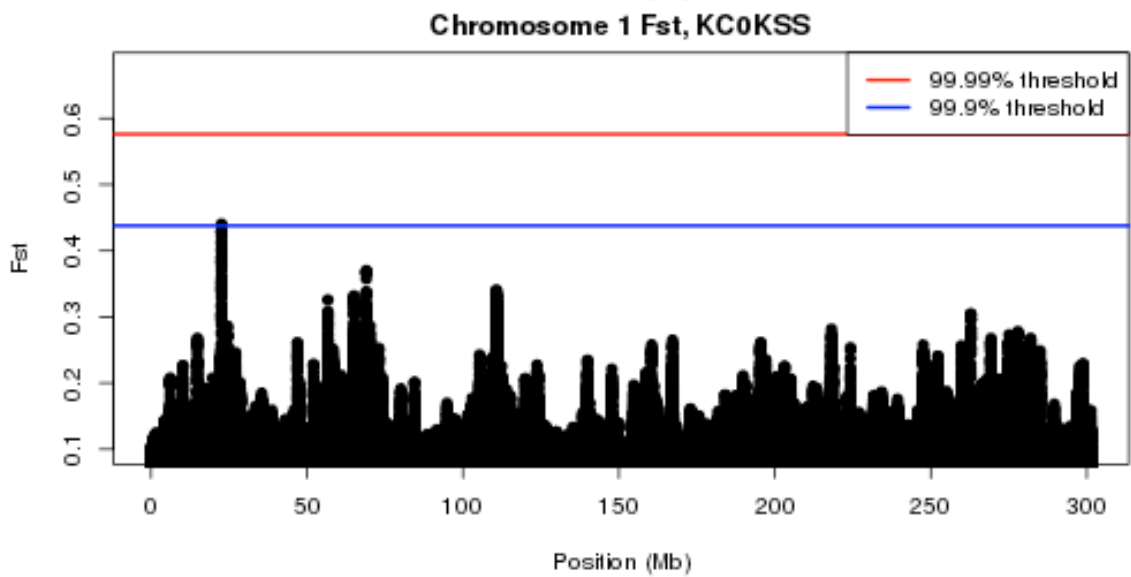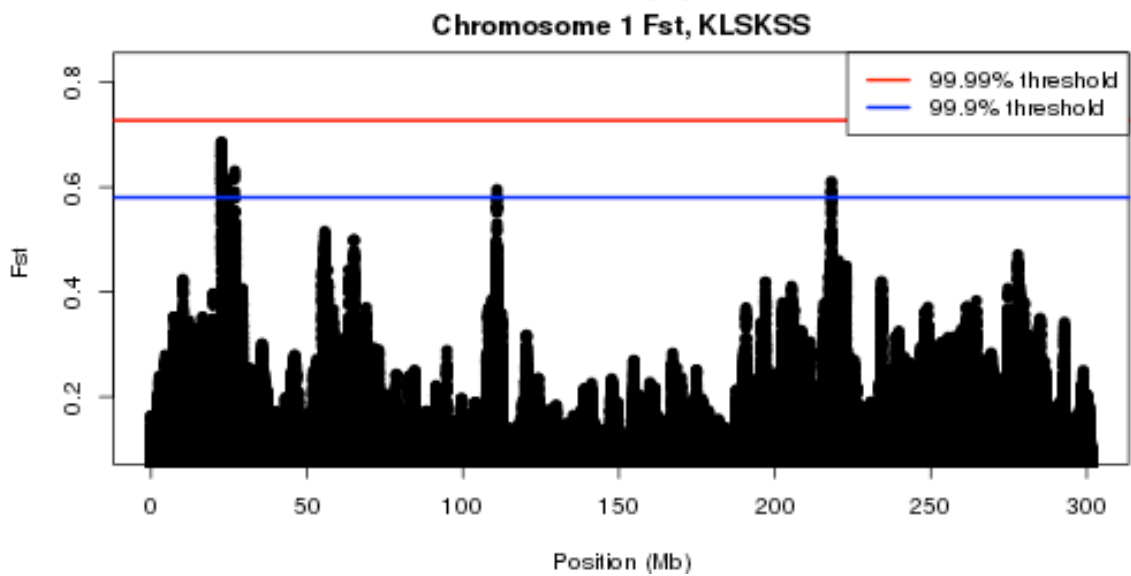

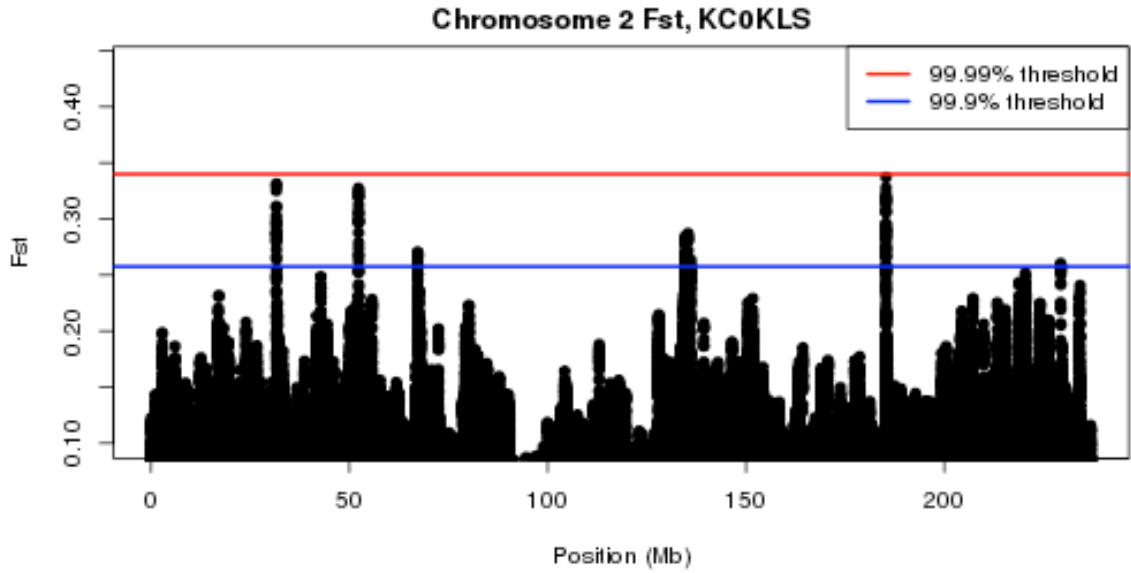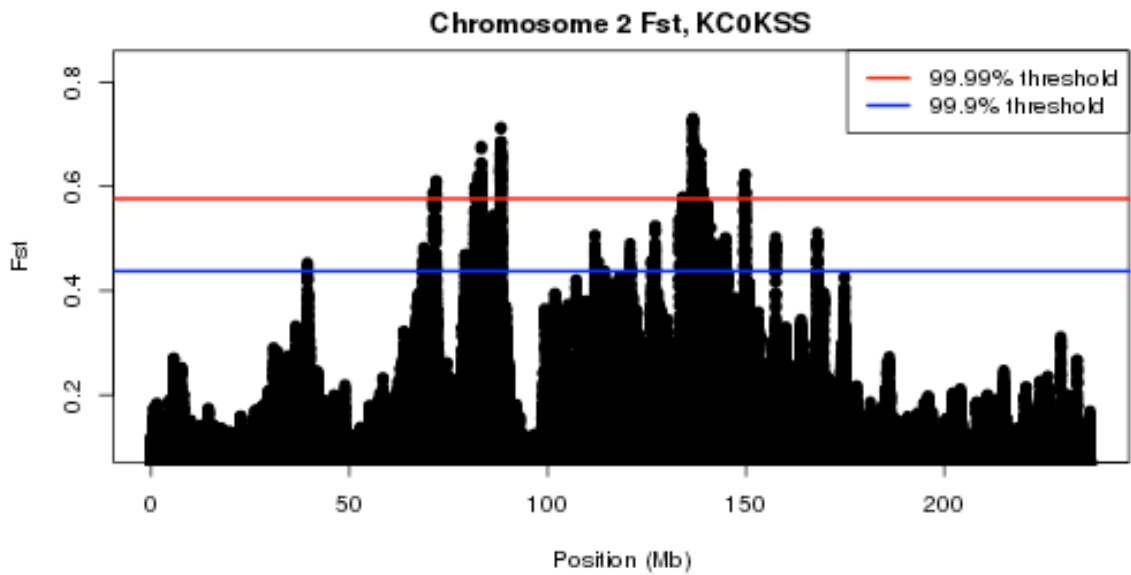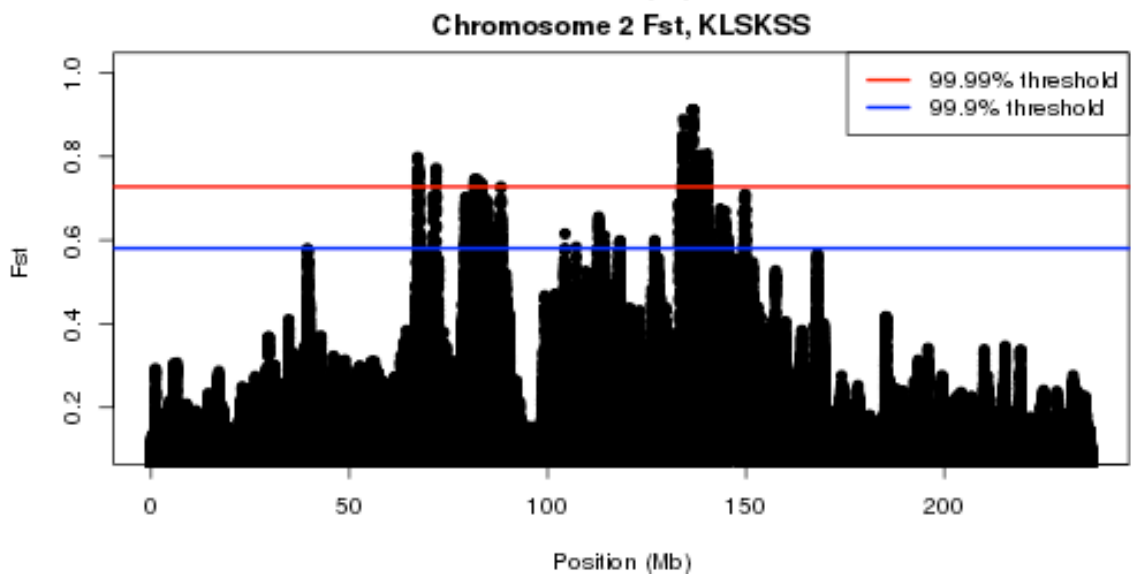

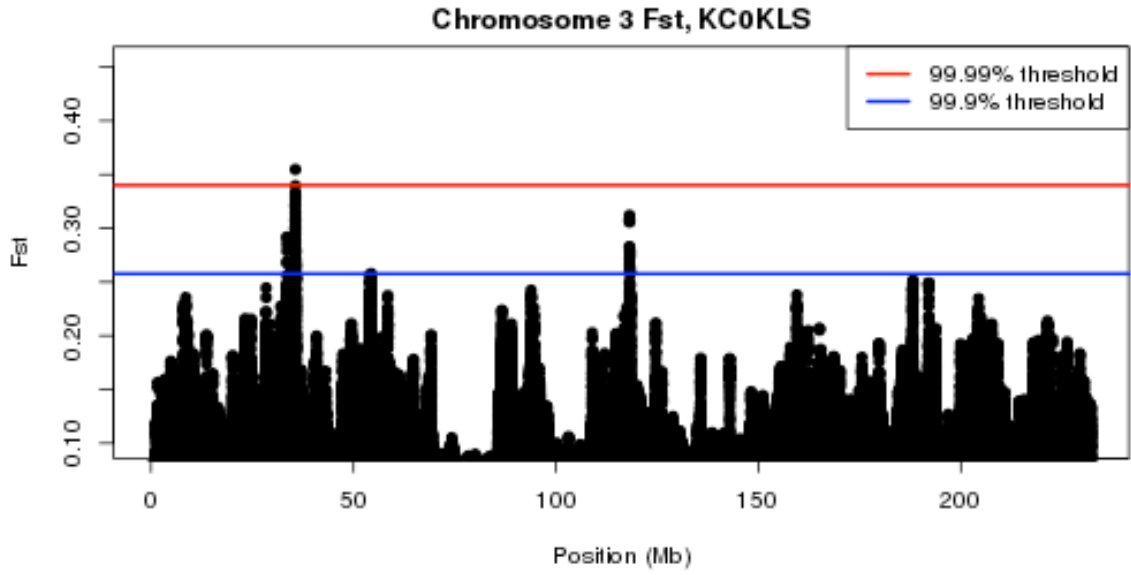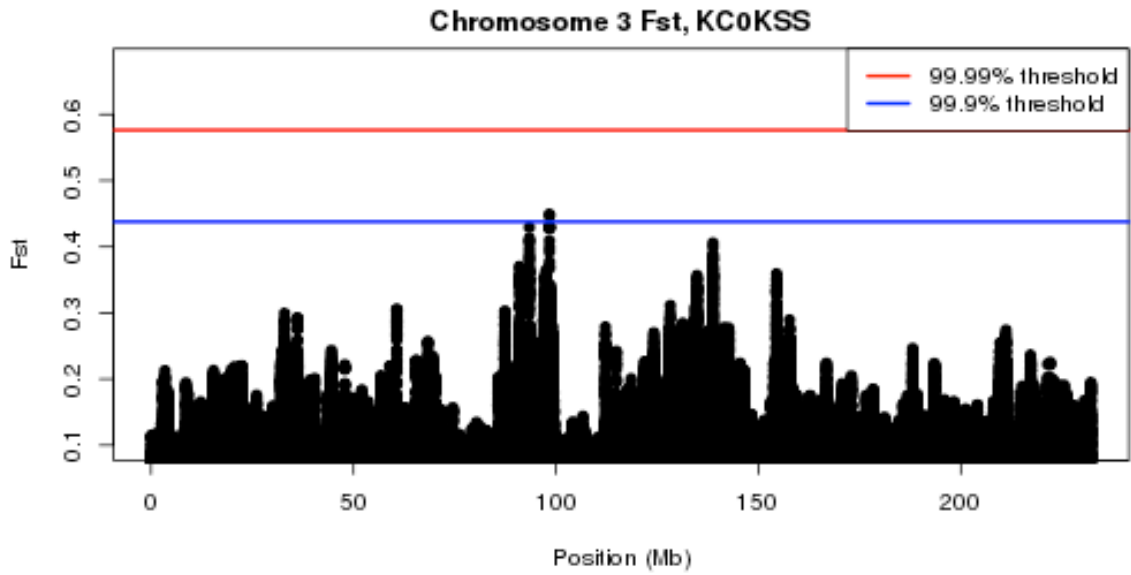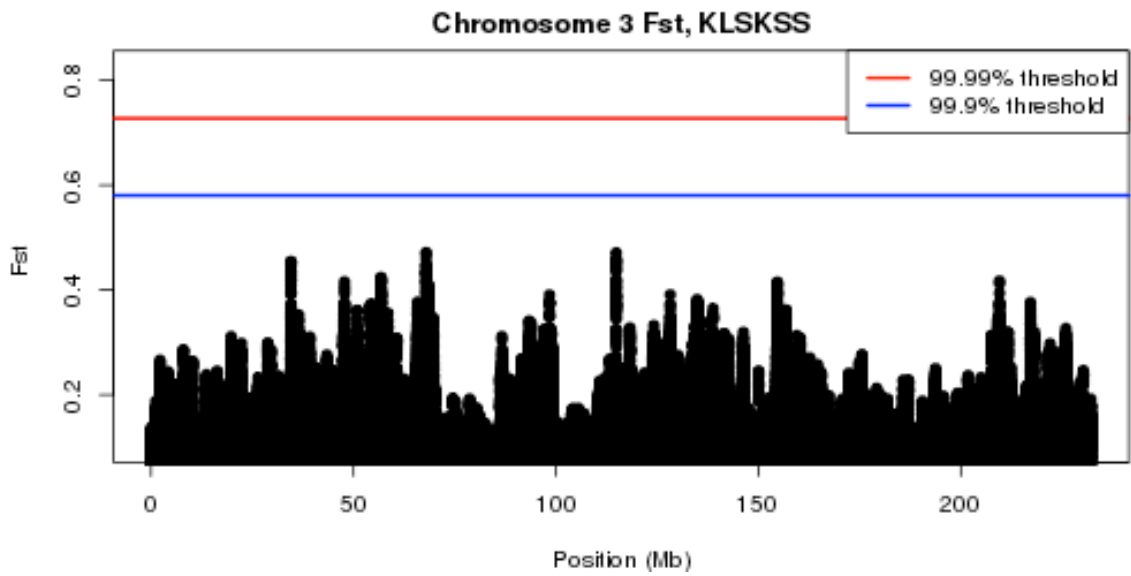

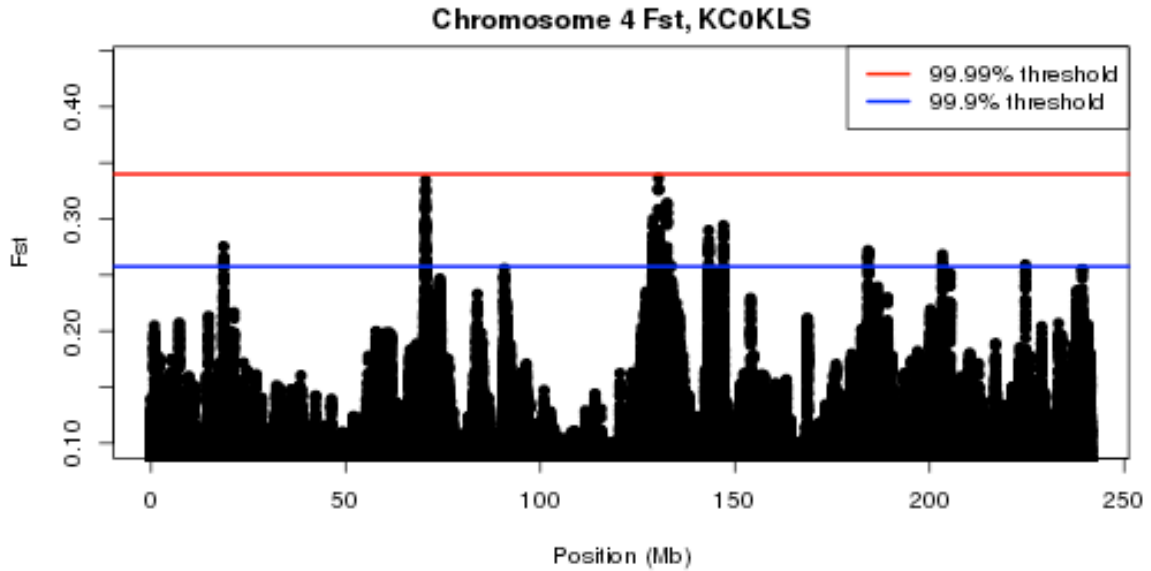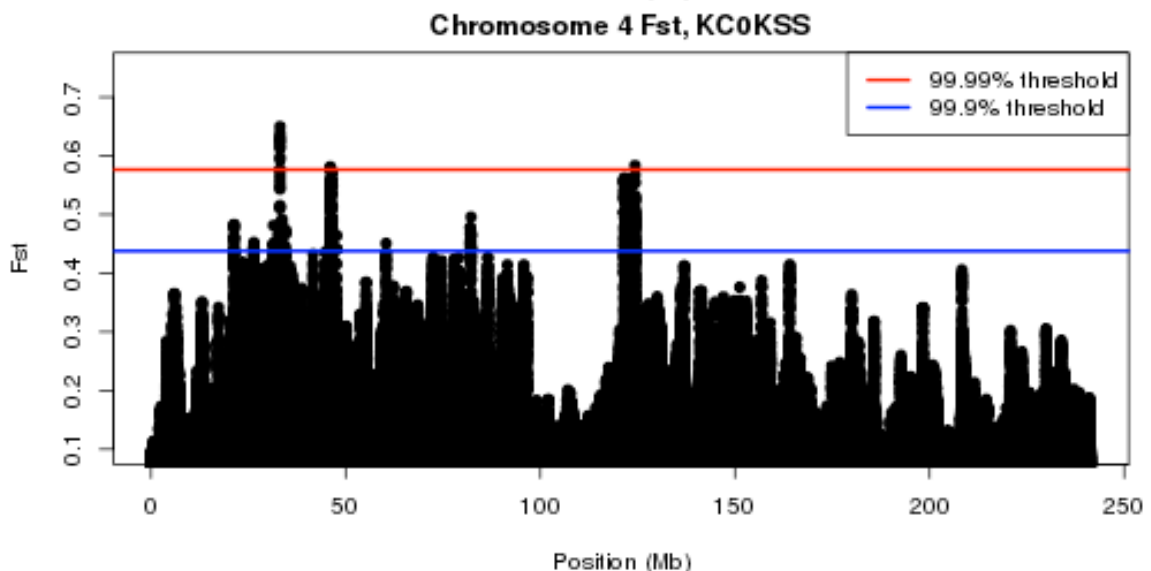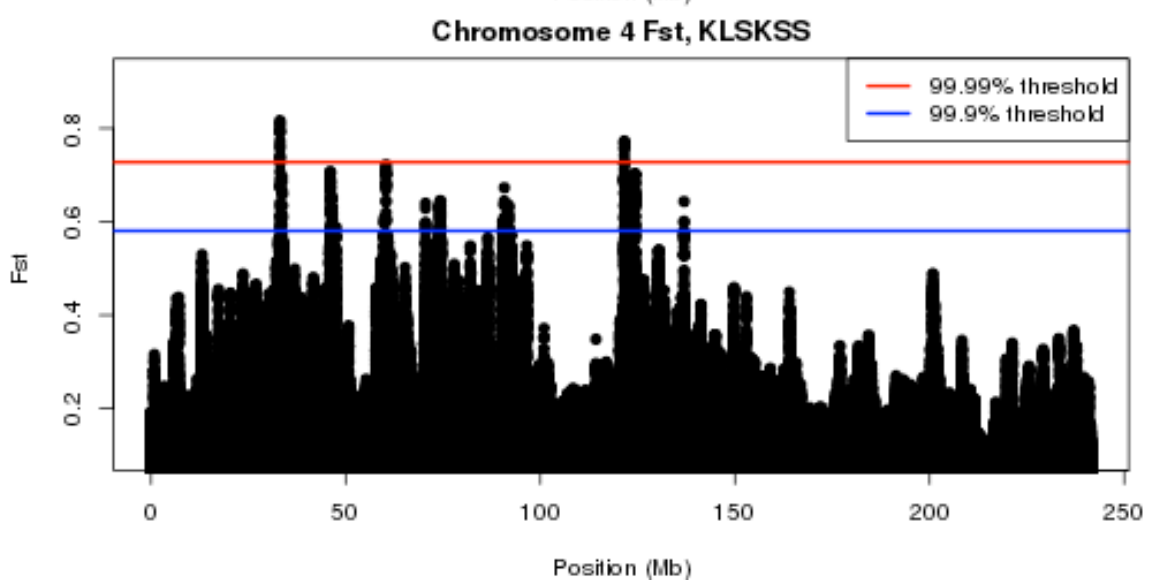

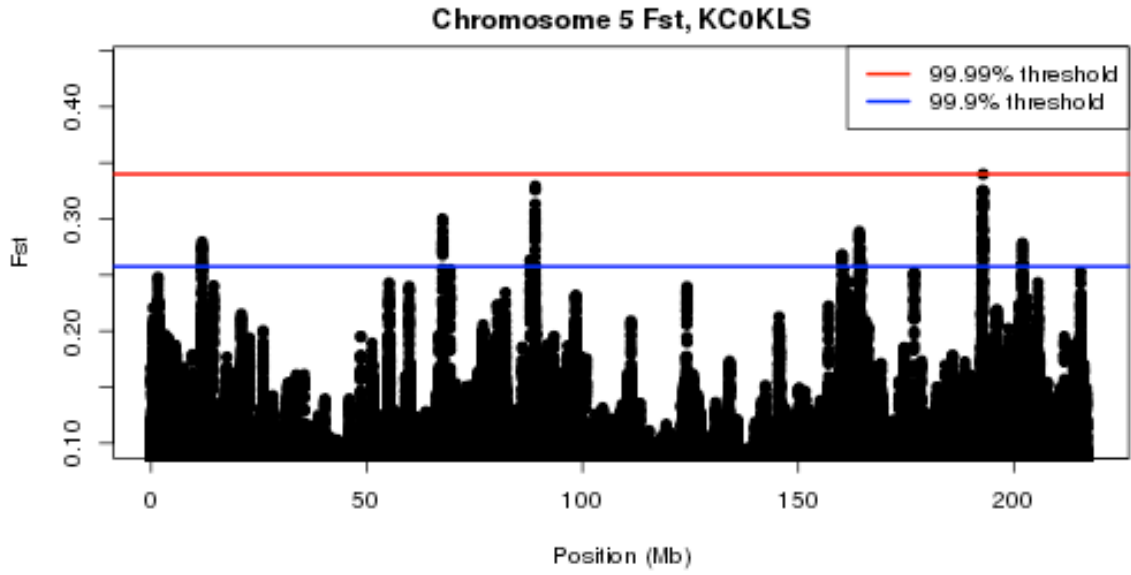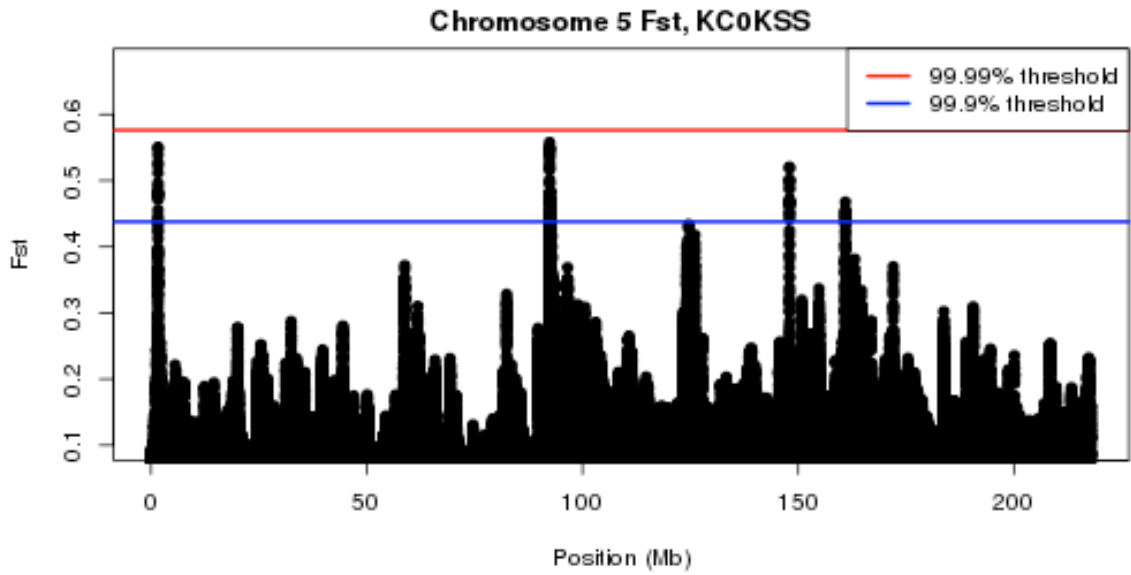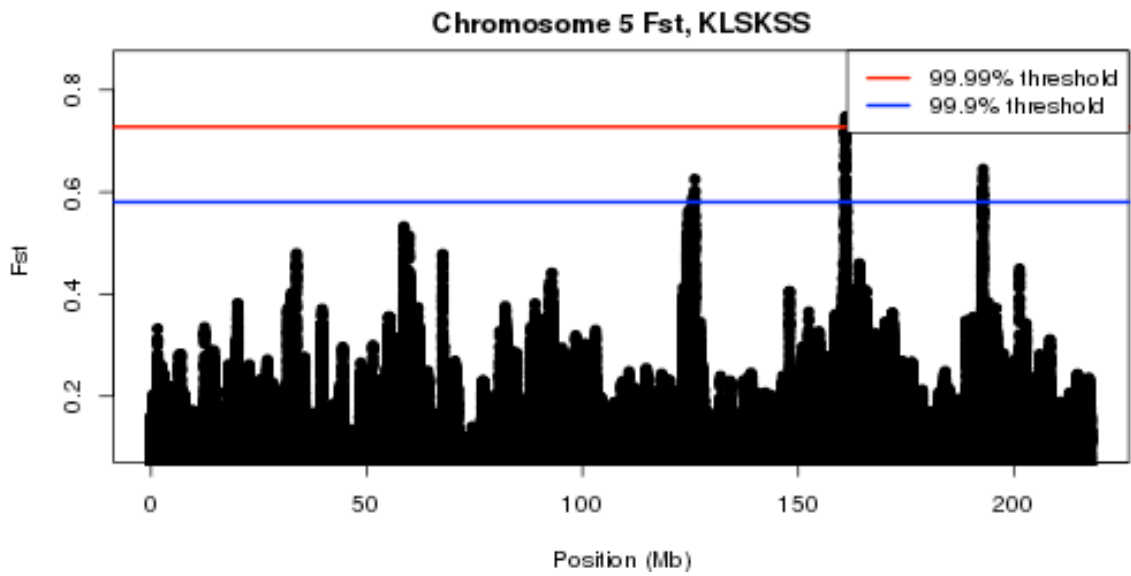

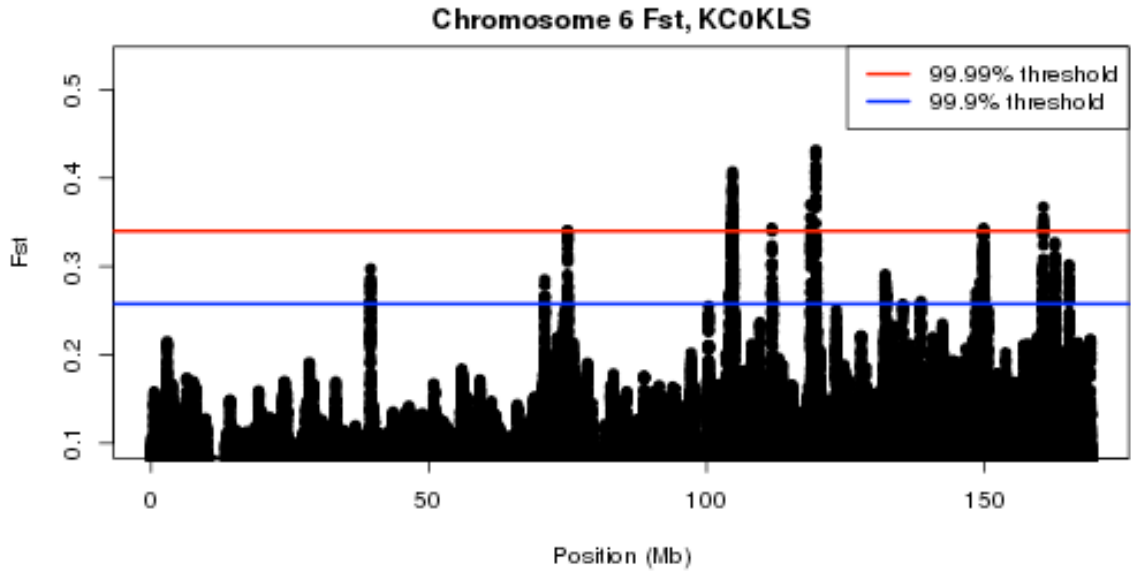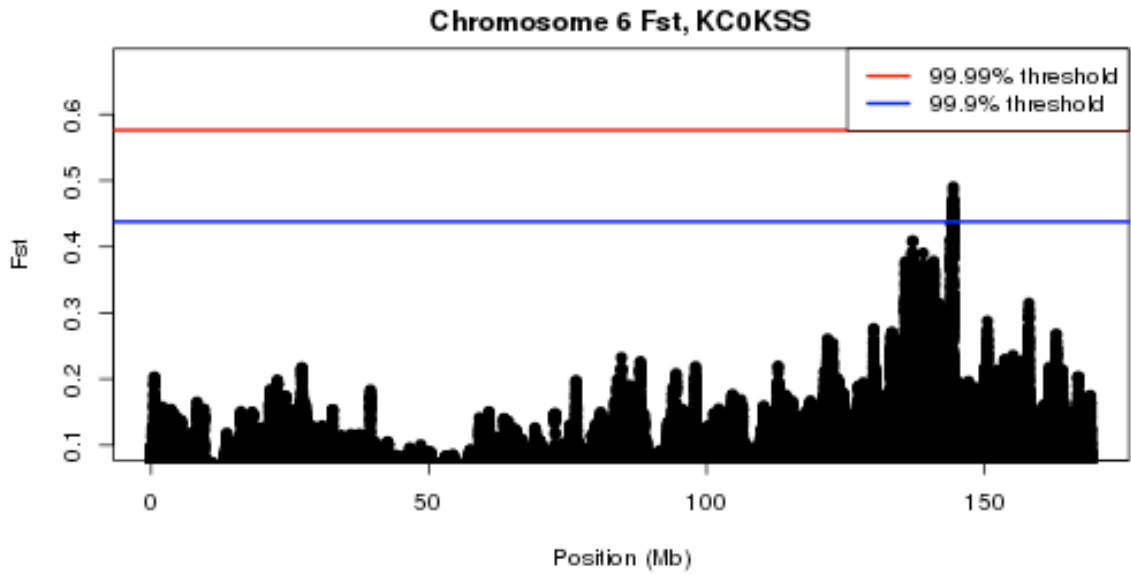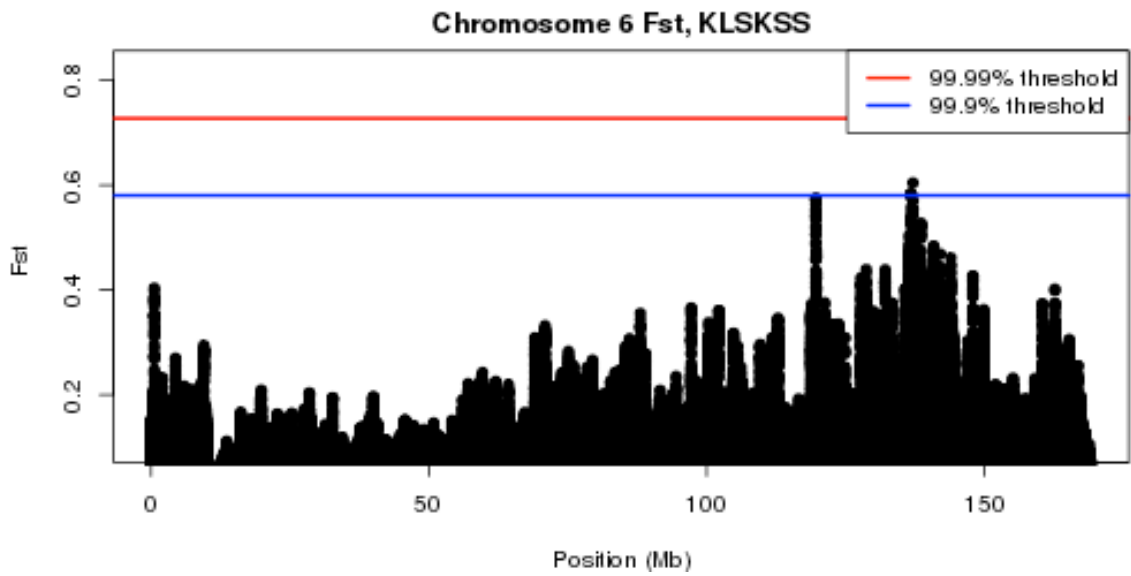

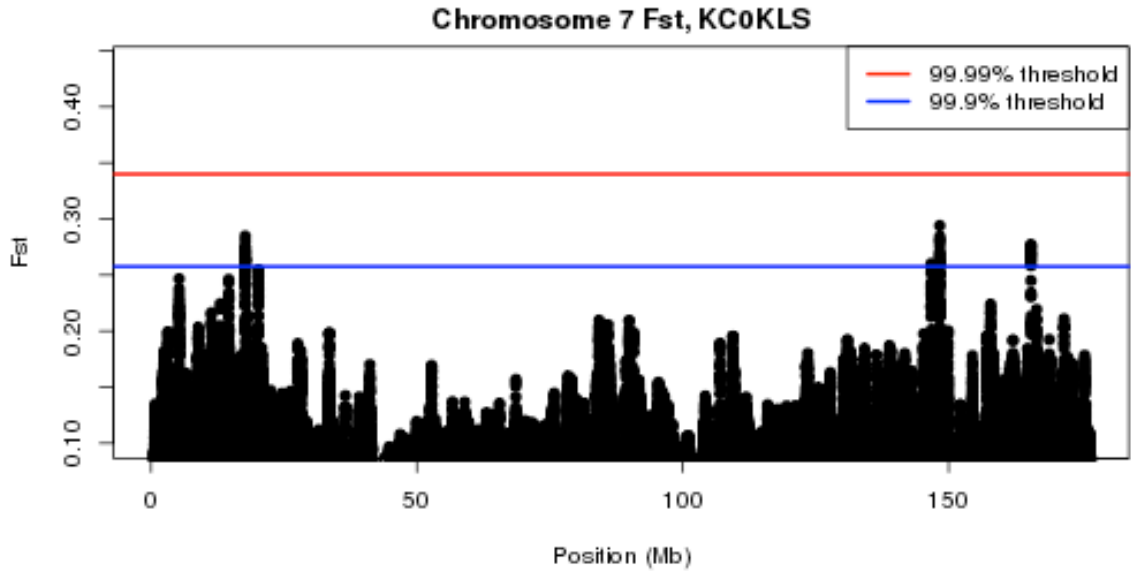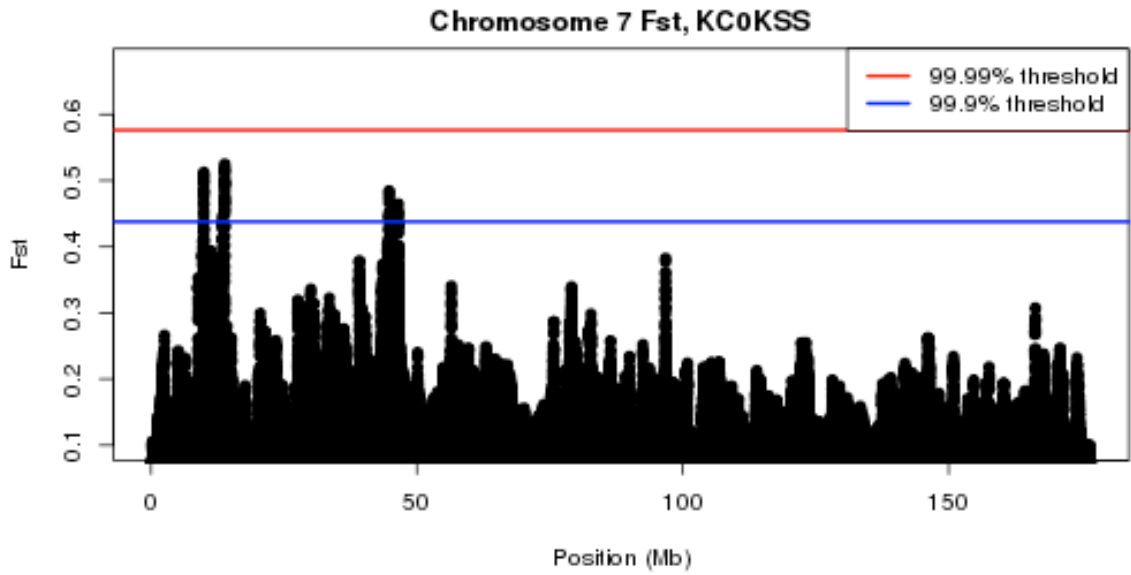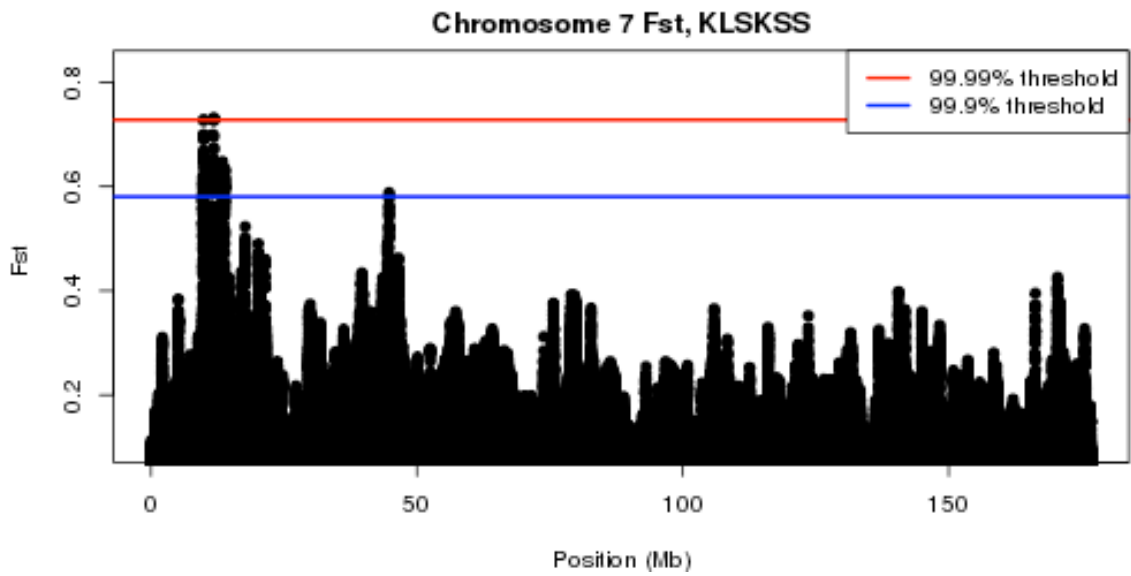



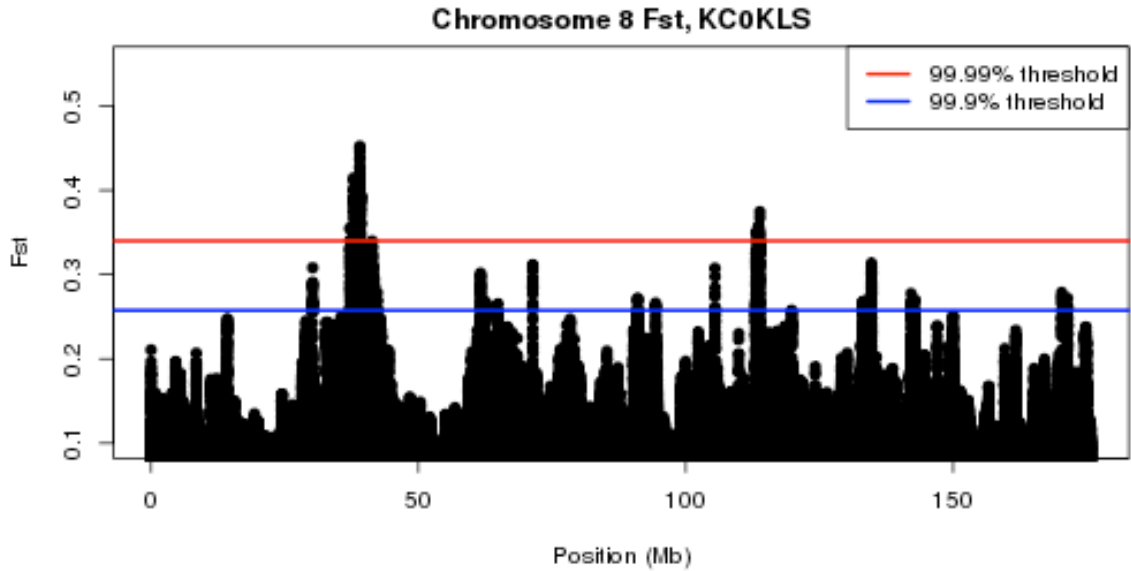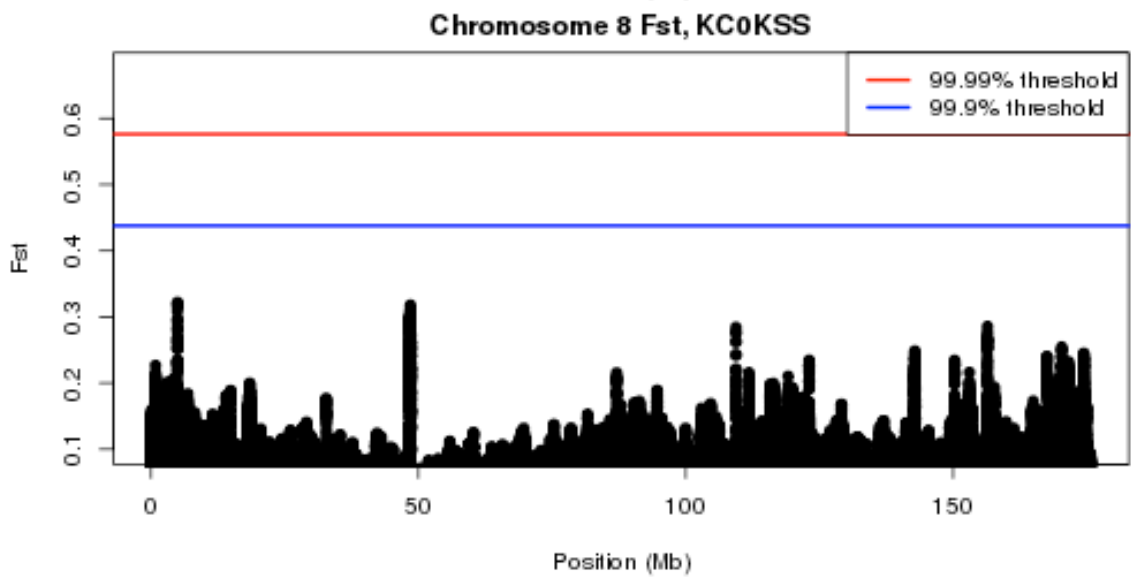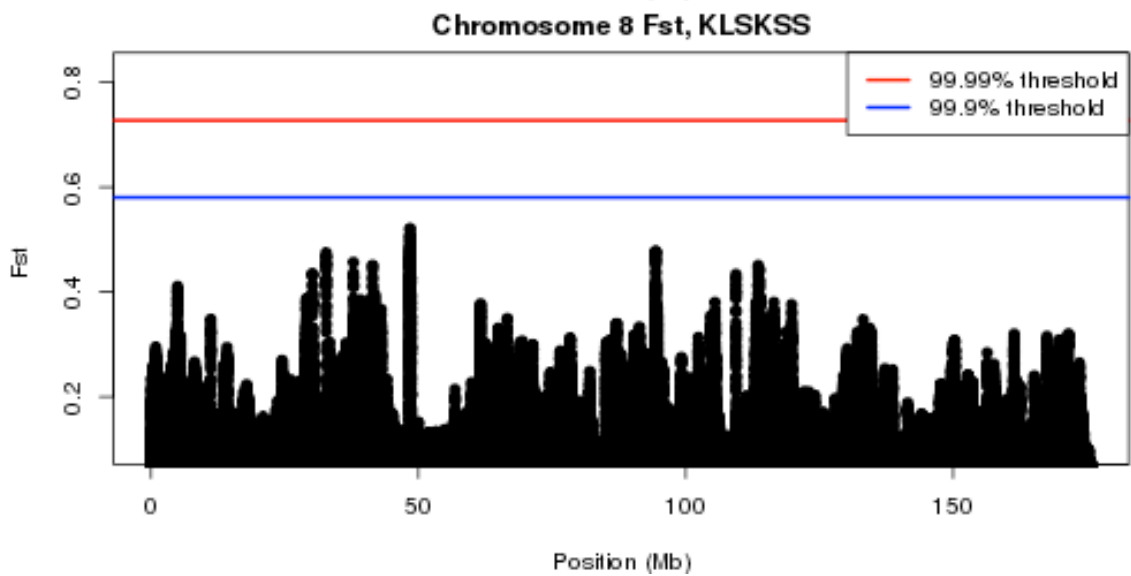

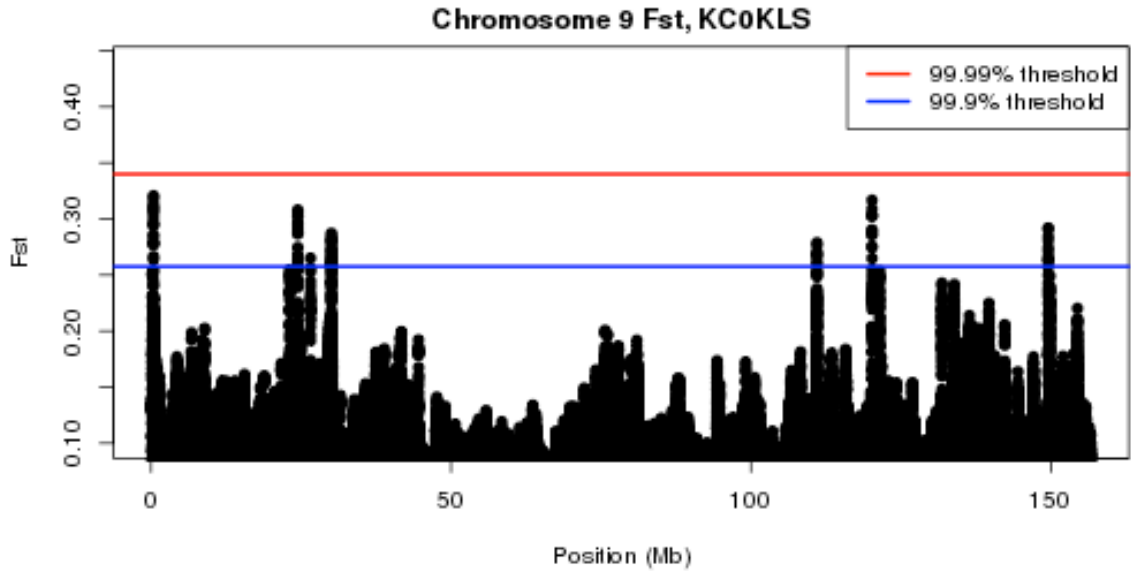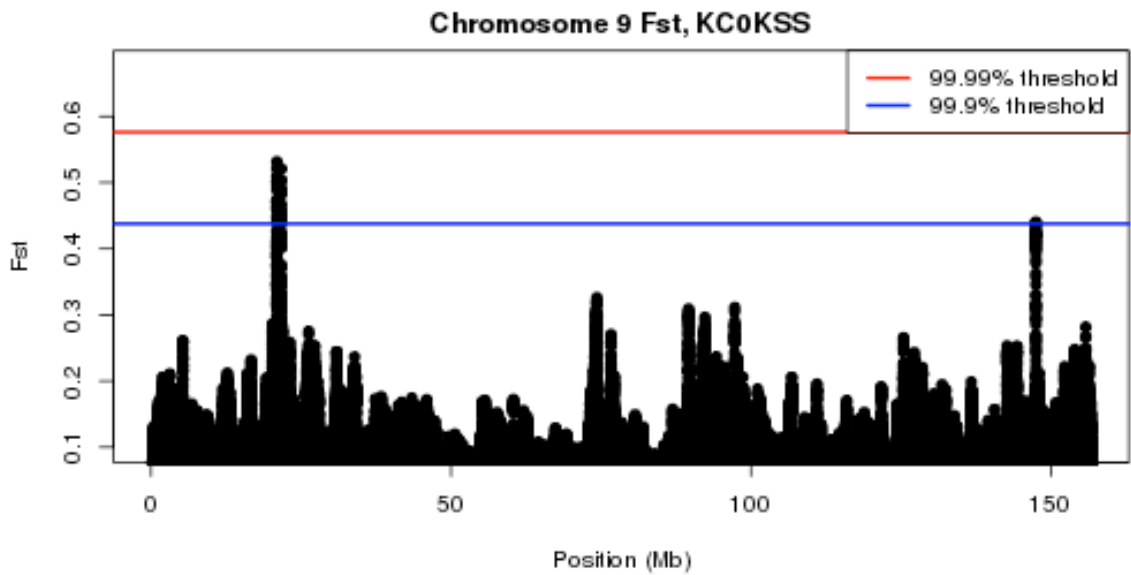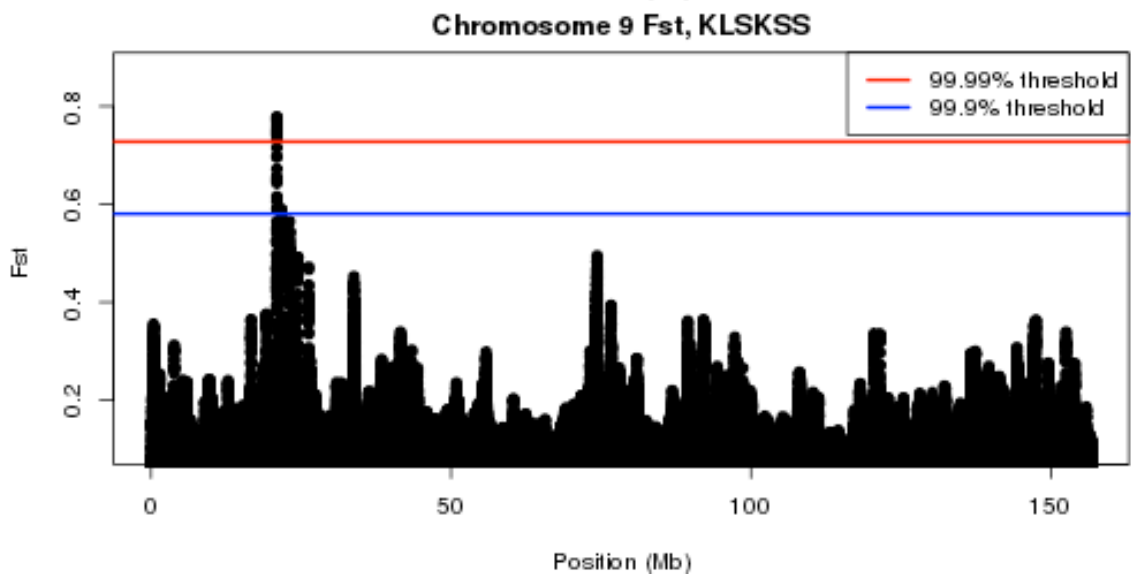

**Chromosome 10 Fst, KC0KLS**

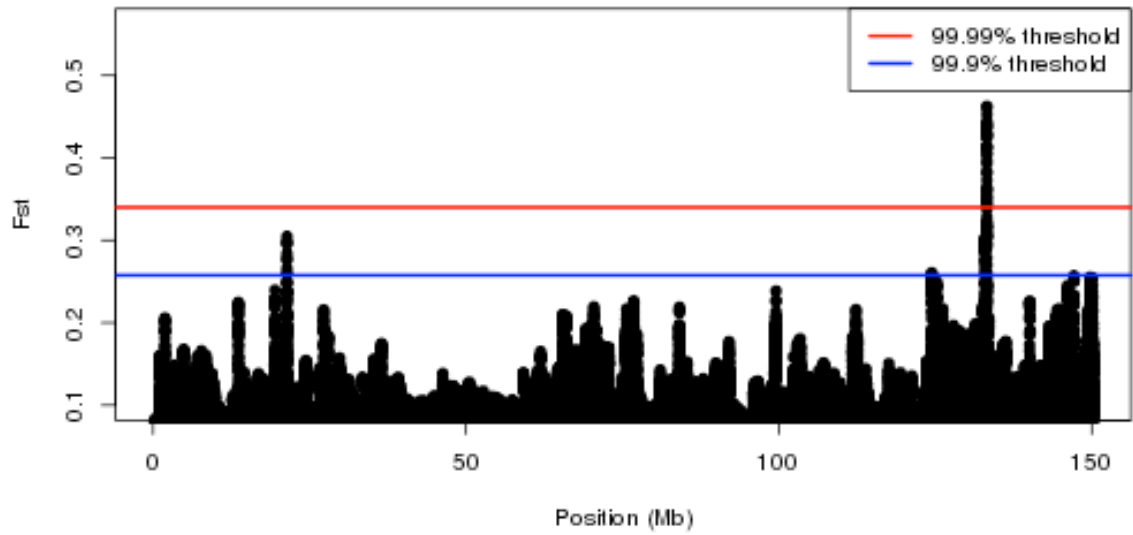

**Chromosome 10 Fst, KC0KSS**

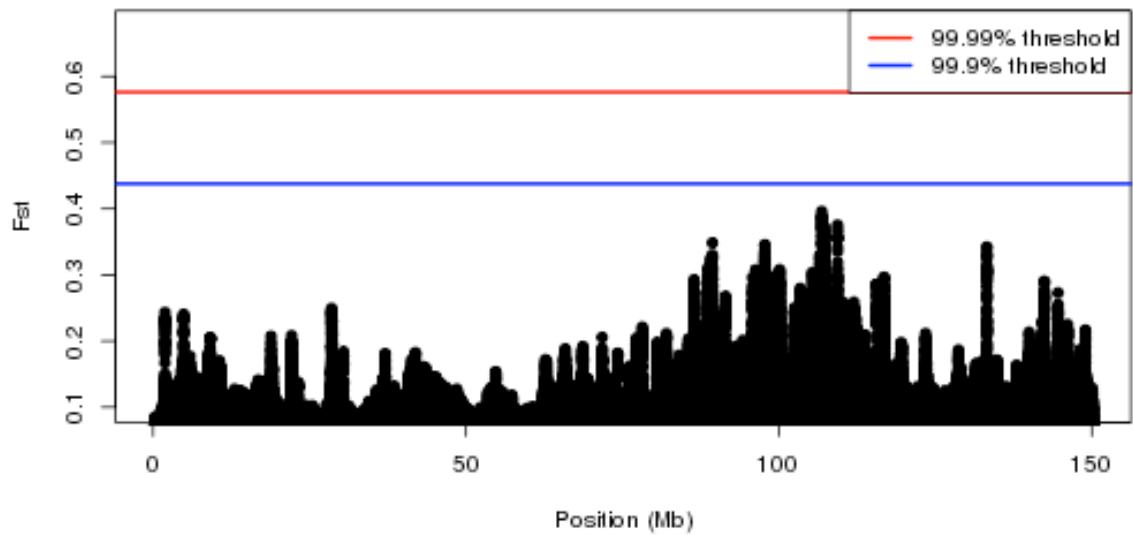

**Chromosome 10 Fst, KLSKSS**

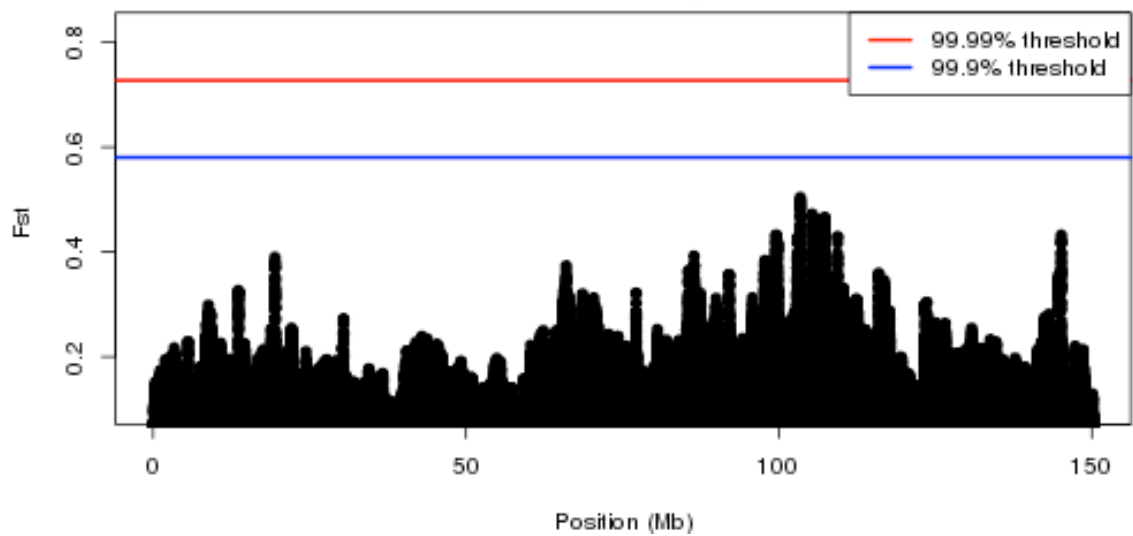

**Figure S2**  $F_{ST}$  values for each of the maize chromosomes.  $F_{ST}$  values were calculated using a 25-single nucleotide polymorphism (SNP) sliding window approach. Comparisons were made between Krug Yellow Dent and KLS\_30, Krug Yellow Dent and KSS\_30, and KLS\_30 and KSS\_30.

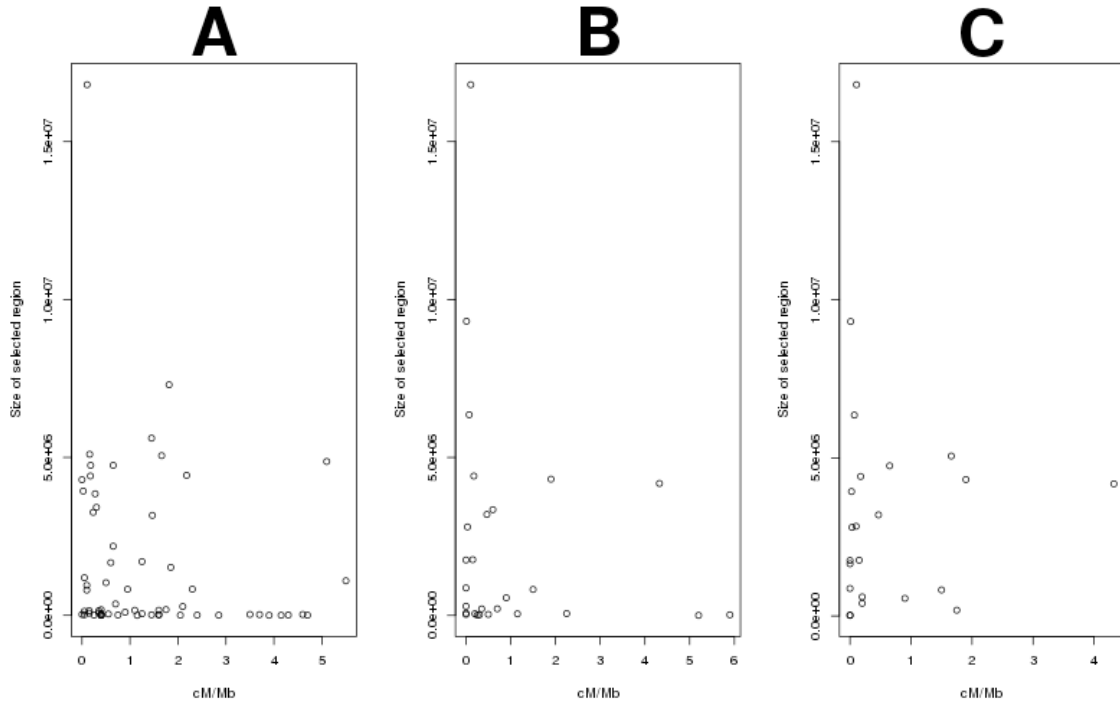

**Figure S3** Region size versus relative recombination rate for each region identified as putatively under selection in the Krug long-term selection populations at the 99.9% outlier threshold. A) Regions identified by comparing Krug Yellow Dent to KLS\_30, B) Regions identified by comparing Krug Yellow Dent to KSS\_30, C) Regions identified by comparing KLS\_30 and KSS\_30. For all, relative levels of recombination across the genome were approximated based on recombination frequencies in the intermated B73 x Mo17 population. No significant correlations were observed.

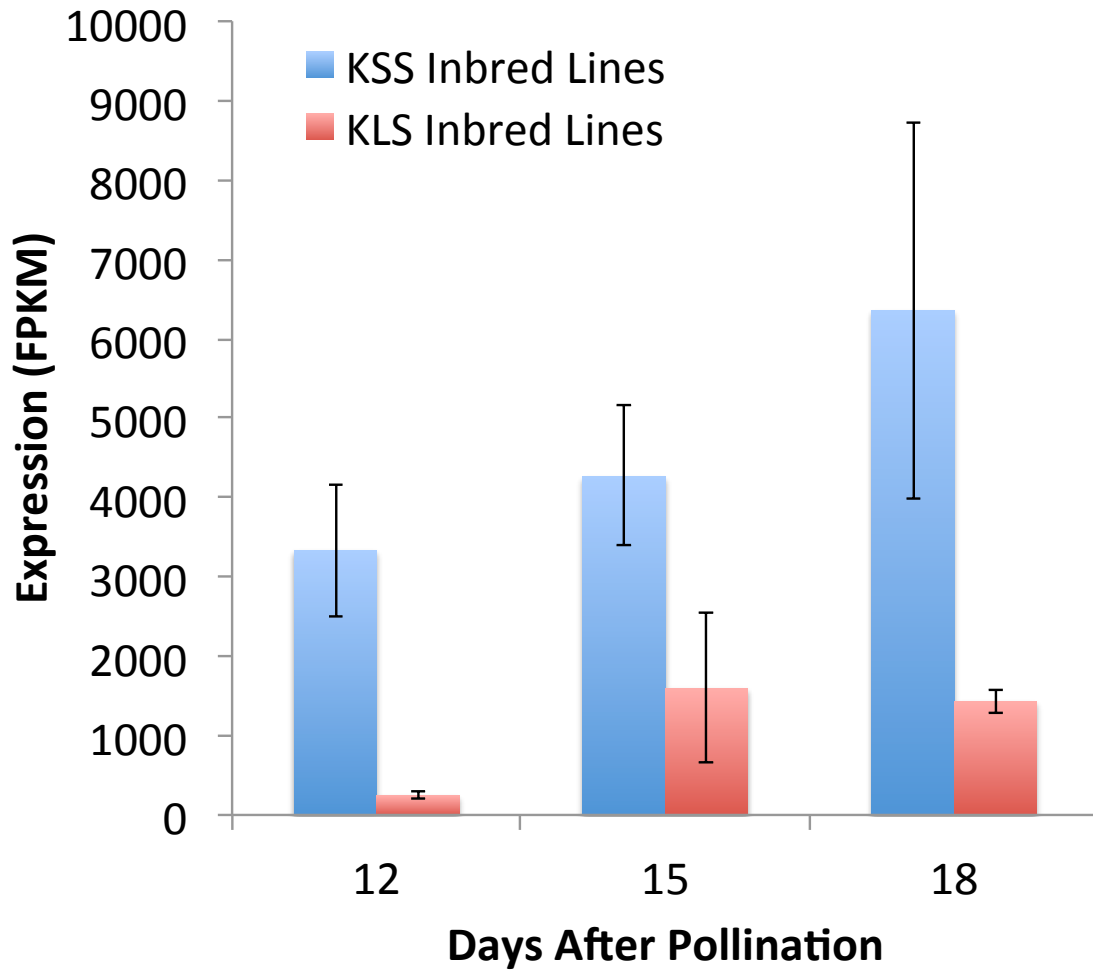

**Figure S4** Average endosperm transcript abundance estimates for inbred lines derived from the KSS\_30 and KLS\_30 populations for the *Opaque2* gene. Error bars show standard deviations calculated from three biological replicates. Data for this figure was obtained from (SEKHON *et al.* 2014).

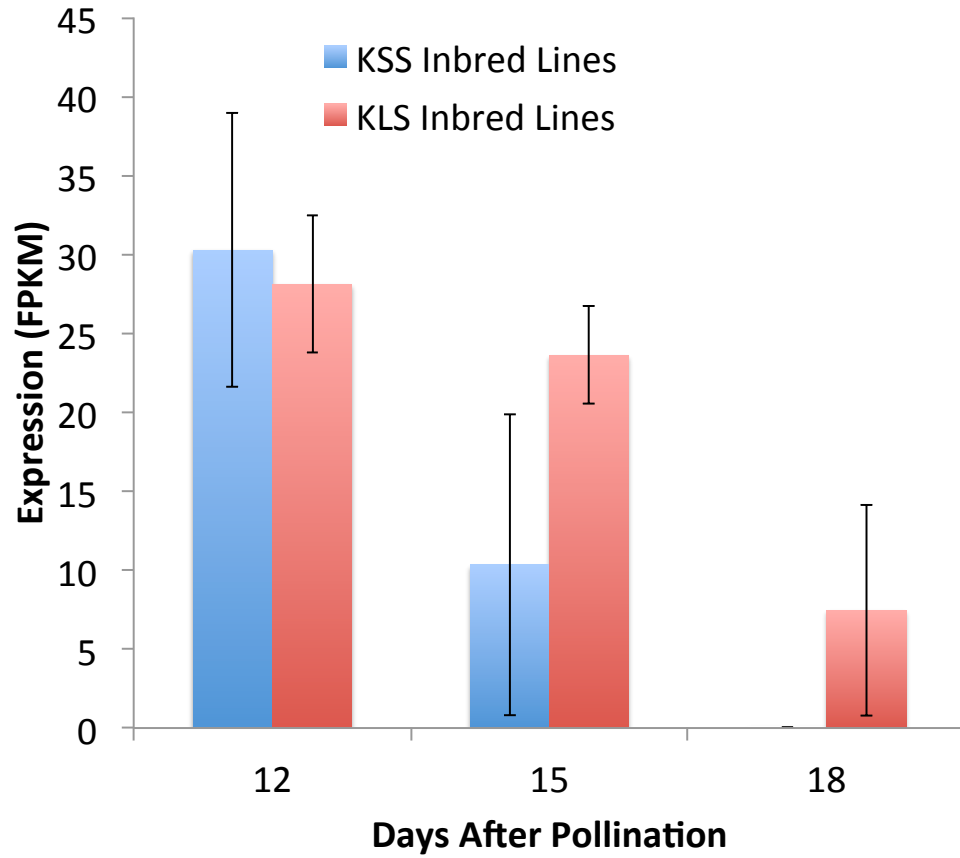

**Figure S5** Average endosperm transcript abundance estimates for inbred lines derived from the KSS\_30 and KLS\_30 populations for the gene GRMZM2G069078. Error bars show standard deviations calculated from three biological replicates. Data for this figure was obtained from (SEKHON *et al.* 2014)

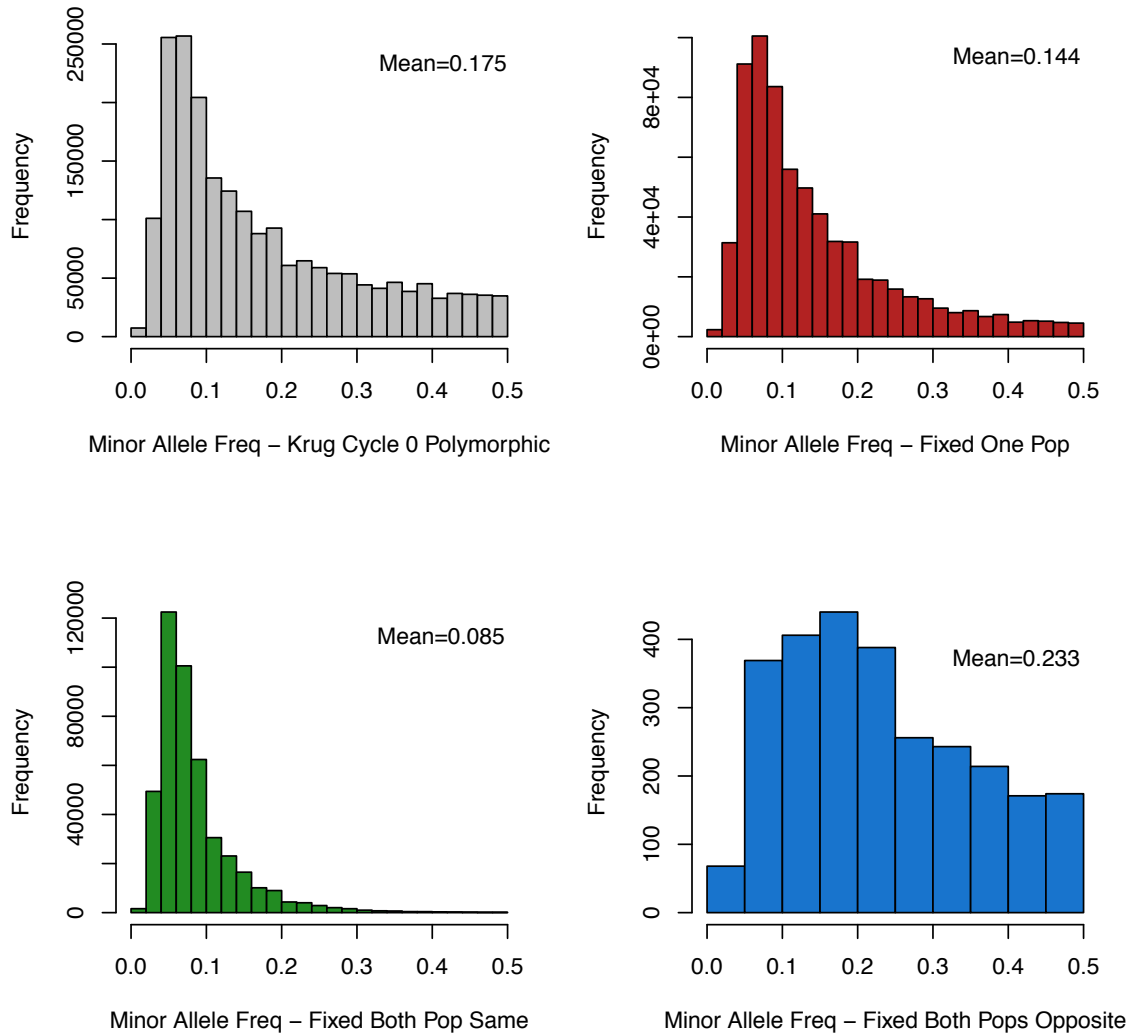

**Figure S6** Empirical minor allele frequency for 2,056,663 SNPs that were polymorphic in the Krug Yellow Dent population and subsets of these SNPs that were fixed in one or both of the selected populations. 664,056 SNPs reached fixation in only one population (red), 444,599 SNPs reached fixation in both populations with the same fixed allele (green), and 2,729 SNPs reads in both populations reached fixation in both populations with oppositely fixed SNPs (blue).



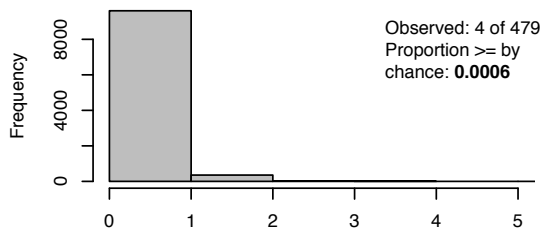

Overlap Random CGH Regions with Observed SeqCNV Regions

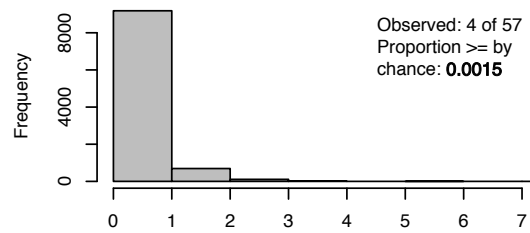

Overlap Random SeqCNV Regions with Observed CGH Regions

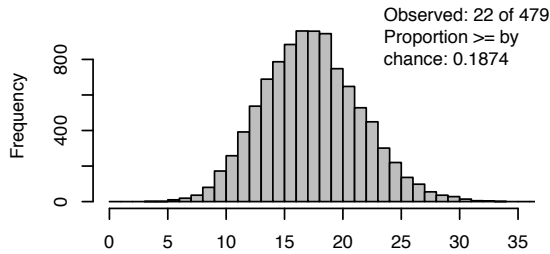

Overlap Random CGH Regions with Observed NAM Regions

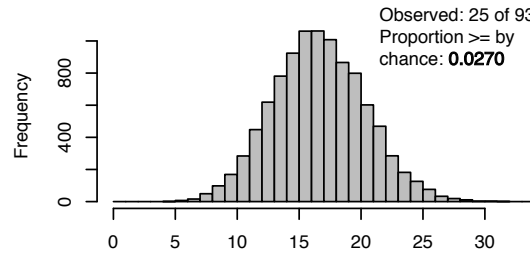

Overlap Random NAM Regions with Observed CGH Regions

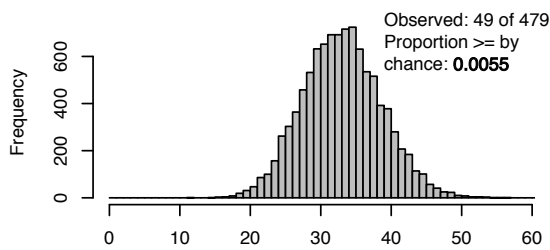

Overlap Random CGH Regions with Observed Sweep Regions

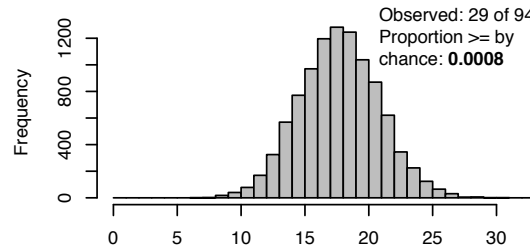

Overlap Random Sweep Regions with Observed CGH Regions

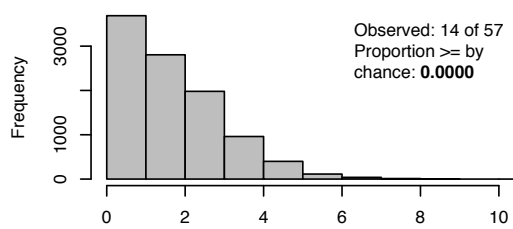

Overlap Random SeqCNV Regions with Observed NAM Regions

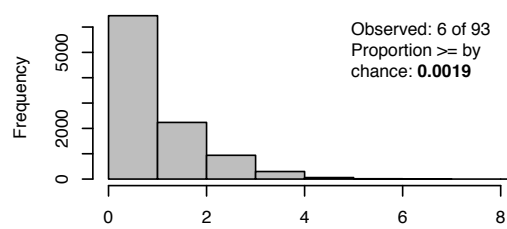

Overlap Random NAM Regions with Observed SeqCNV Regions

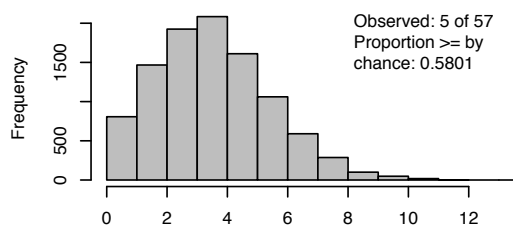

Overlap Random SeqCNV Regions with Observed Sweep Regions

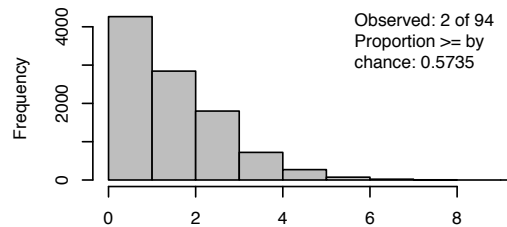

Overlap Random Sweep Regions with Observed SeqCNV Regions

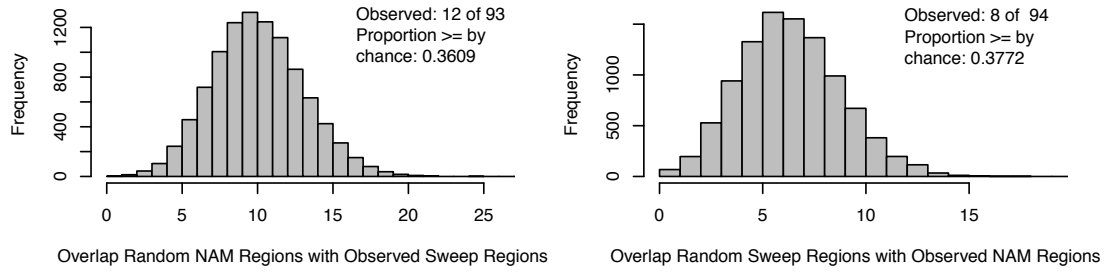

**Figure S7** Simulation experiment testing the pair-wise overlap between each source of evidence [comparative genome hybridization (CGH) copy number variation (CNV) regions, sequence depth CNV regions (SeqCNV), regions exceeding the 99.9% outlier threshold (Sweep Regions), and regions identified in the nested association mapping (NAM) population] by chance compared with the empirically observed overlap. Regions with the empirically observed size were randomly placed throughout the genome 10,000 for each source of evidence. Comparisons were then made between the random data and observed data to test the overlap that was observed by chance.

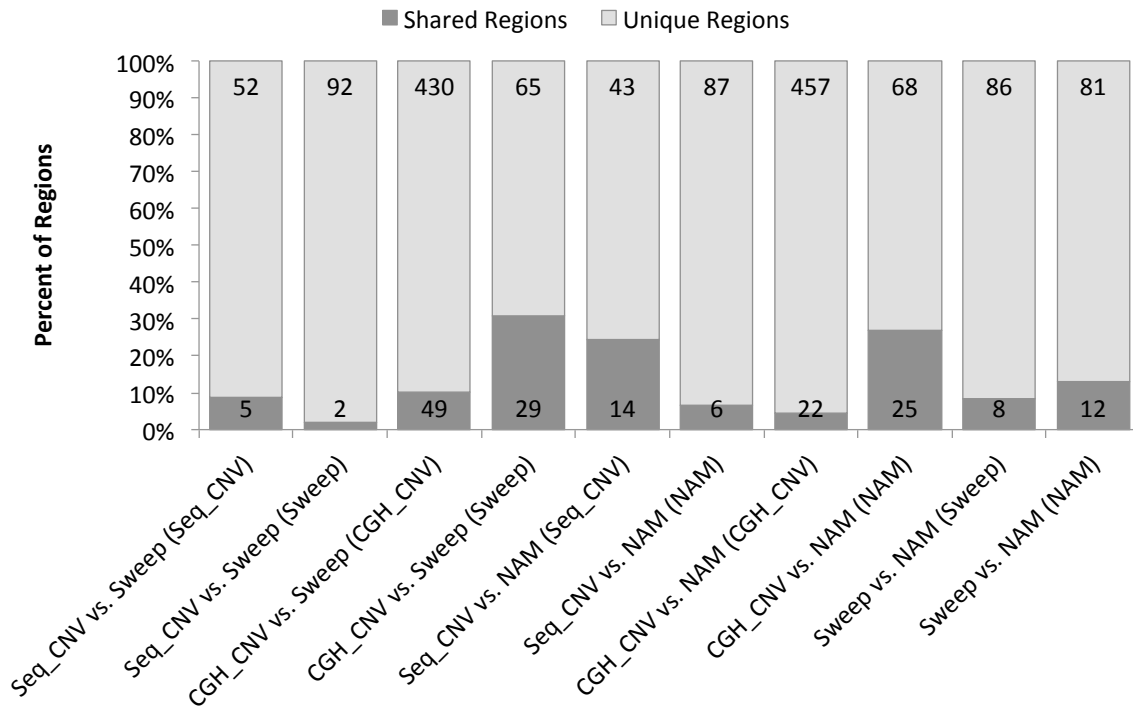

**Figure S8** Pair-wise comparisons of overlapping variable regions in the Krug Yellow Dent divergent long-term selection experiment for seed size and quantitative trait loci for seed weight in the maize nested association (NAM) population. Type of variation in parenthesis following the pair-wise comparison description indicates which type of variation the bar pertains to. A comparison with NAM SNPs required regions to be within 500kb to be considered shared regions and for all other comparisons 10kb overlap was required.

**Table S1 Candidate regions under selection during 30 generations of selection for seed size, at the 99.9% level.** Regions were identified using  $F_{ST}$  values and a 25-single nucleotide polymorphism (SNP) sliding window approach. Comparisons were made between Krug Yellow Dent and KLS\_30, Krug Yellow Dent and KSS\_30, and KLS\_30 and KSS\_30. One indicates a difference and zero indicates no difference for the region.

| Region | Chromosome | Start     | End       | Krug Yellow Dent vs. KLS_30 | Krug Yellow Dent vs. KSS_30 | KLS_30 vs. KSS_30 | Number of Genes in Region |
|--------|------------|-----------|-----------|-----------------------------|-----------------------------|-------------------|---------------------------|
| 1      | chr1       | 2088034   | 2099502   | 1                           | 0                           | 0                 | 2                         |
| 2      | chr1       | 13507647  | 13537594  | 1                           | 0                           | 0                 | 1                         |
| 3      | chr1       | 22511847  | 26826200  | 0                           | 1                           | 1                 | 103                       |
| 4      | chr1       | 24438690  | 31739806  | 1                           | 0                           | 0                 | 169                       |
| 5      | chr1       | 54928624  | 55758694  | 1                           | 0                           | 0                 | 18                        |
| 6      | chr1       | 110877561 | 110898319 | 0                           | 0                           | 1                 | 0                         |
| 7      | chr1       | 198652274 | 203086089 | 1                           | 0                           | 0                 | 100                       |
| 8      | chr1       | 210227884 | 210245719 | 1                           | 0                           | 0                 | 1                         |
| 9      | chr1       | 215729004 | 220787144 | 1                           | 0                           | 1                 | 92                        |
| 10     | chr1       | 241280862 | 241441394 | 1                           | 0                           | 0                 | 7                         |
| 11     | chr1       | 260539402 | 263706680 | 1                           | 0                           | 0                 | 74                        |
| 12     | chr1       | 297792787 | 297796118 | 1                           | 0                           | 0                 | 1                         |
| 13     | chr10      | 21394962  | 21401418  | 1                           | 0                           | 0                 | 1                         |
| 14     | chr10      | 124383915 | 124428189 | 1                           | 0                           | 0                 | 1                         |
| 15     | chr10      | 132885971 | 133247775 | 1                           | 0                           | 0                 | 9                         |
| 16     | chr2       | 31592504  | 31644896  | 1                           | 0                           | 0                 | 2                         |
| 17     | chr2       | 39419610  | 39427387  | 0                           | 1                           | 0                 | 2                         |
| 18     | chr2       | 52315602  | 52324852  | 1                           | 0                           | 0                 | 1                         |
| 19     | chr2       | 67149060  | 71899682  | 1                           | 0                           | 1                 | 44                        |
| 20     | chr2       | 68731886  | 72080518  | 0                           | 1                           | 0                 | 33                        |
| 21     | chr2       | 79033475  | 88346653  | 0                           | 1                           | 1                 | 79                        |
| 22     | chr2       | 104374659 | 107211278 | 0                           | 0                           | 1                 | 27                        |
| 23     | chr2       | 111890936 | 118244338 | 0                           | 1                           | 1                 | 70                        |
| 24     | chr2       | 120764979 | 120833500 | 0                           | 1                           | 0                 | 1                         |
| 25     | chr2       | 126240290 | 127110286 | 0                           | 1                           | 1                 | 6                         |
| 26     | chr2       | 133138750 | 149941557 | 1                           | 1                           | 1                 | 215                       |
| 27     | chr2       | 157461751 | 157483350 | 0                           | 1                           | 0                 | 1                         |
| 28     | chr2       | 167971120 | 168003596 | 0                           | 1                           | 0                 | 2                         |
| 29     | chr2       | 185293453 | 185305296 | 1                           | 0                           | 0                 | 1                         |
| 30     | chr2       | 229346615 | 229355363 | 1                           | 0                           | 0                 | 1                         |
| 31     | chr3       | 33560667  | 35750525  | 1                           | 0                           | 0                 | 39                        |
| 32     | chr3       | 54372654  | 54403213  | 1                           | 0                           | 0                 | 0                         |
| 33     | chr3       | 98358330  | 98391049  | 0                           | 1                           | 0                 | 0                         |
| 34     | chr3       | 118149134 | 118294301 | 1                           | 0                           | 0                 | 3                         |
| 35     | chr4       | 18677194  | 18683044  | 1                           | 0                           | 0                 | 1                         |
| 36     | chr4       | 21278849  | 21337830  | 0                           | 1                           | 0                 | 2                         |
| 37     | chr4       | 26373871  | 26423688  | 0                           | 1                           | 0                 | 3                         |

|    |      |           |           |   |   |   |     |
|----|------|-----------|-----------|---|---|---|-----|
| 38 | chr4 | 31360987  | 34558254  | 0 | 1 | 1 | 52  |
| 39 | chr4 | 45849344  | 47615468  | 0 | 1 | 1 | 12  |
| 40 | chr4 | 59868197  | 60425643  | 0 | 1 | 1 | 8   |
| 41 | chr4 | 70497566  | 74434332  | 1 | 0 | 1 | 46  |
| 42 | chr4 | 82008572  | 82215823  | 0 | 1 | 0 | 6   |
| 43 | chr4 | 90311130  | 91962113  | 0 | 0 | 1 | 8   |
| 44 | chr4 | 121554377 | 124356978 | 0 | 1 | 1 | 27  |
| 45 | chr4 | 128919570 | 133670654 | 1 | 0 | 0 | 48  |
| 46 | chr4 | 136905695 | 136928673 | 0 | 0 | 1 | 0   |
| 47 | chr4 | 143240267 | 147090538 | 1 | 0 | 0 | 59  |
| 48 | chr4 | 184169869 | 184450981 | 1 | 0 | 0 | 7   |
| 49 | chr4 | 203316217 | 203332954 | 1 | 0 | 0 | 0   |
| 50 | chr4 | 224661121 | 224666412 | 1 | 0 | 0 | 0   |
| 51 | chr5 | 1591098   | 1611277   | 0 | 1 | 0 | 3   |
| 52 | chr5 | 11820020  | 11823805  | 1 | 0 | 0 | 1   |
| 53 | chr5 | 67479937  | 67630316  | 1 | 0 | 0 | 5   |
| 54 | chr5 | 87886831  | 89078200  | 1 | 0 | 0 | 18  |
| 55 | chr5 | 92352752  | 92644615  | 0 | 1 | 0 | 2   |
| 56 | chr5 | 125437902 | 126041703 | 0 | 0 | 1 | 4   |
| 57 | chr5 | 147926211 | 147981089 | 0 | 1 | 0 | 1   |
| 58 | chr5 | 160128174 | 164541434 | 1 | 1 | 1 | 81  |
| 59 | chr5 | 192685362 | 192867950 | 1 | 0 | 1 | 3   |
| 60 | chr5 | 201980075 | 201986492 | 1 | 0 | 0 | 1   |
| 61 | chr6 | 39475298  | 39536174  | 1 | 0 | 0 | 0   |
| 62 | chr6 | 70833345  | 75128389  | 1 | 0 | 0 | 67  |
| 63 | chr6 | 104020474 | 104846933 | 1 | 0 | 0 | 14  |
| 64 | chr6 | 111743312 | 111905380 | 1 | 0 | 0 | 3   |
| 65 | chr6 | 118700694 | 119737122 | 1 | 0 | 0 | 16  |
| 66 | chr6 | 132125931 | 132306220 | 1 | 0 | 0 | 7   |
| 67 | chr6 | 136744931 | 137145831 | 0 | 0 | 1 | 8   |
| 68 | chr6 | 138564837 | 138585701 | 1 | 0 | 0 | 1   |
| 69 | chr6 | 144188428 | 144399049 | 0 | 1 | 0 | 2   |
| 70 | chr6 | 148547648 | 150068199 | 1 | 0 | 0 | 39  |
| 71 | chr6 | 160413038 | 165284918 | 1 | 0 | 0 | 233 |
| 72 | chr7 | 9710307   | 13889417  | 0 | 1 | 1 | 87  |
| 73 | chr7 | 17688939  | 17714548  | 1 | 0 | 0 | 2   |
| 74 | chr7 | 44745316  | 46501661  | 0 | 1 | 1 | 25  |
| 75 | chr7 | 146699976 | 148403614 | 1 | 0 | 0 | 48  |
| 76 | chr7 | 165464112 | 165470747 | 1 | 0 | 0 | 2   |
| 77 | chr8 | 30179302  | 30251700  | 1 | 0 | 0 | 1   |
| 78 | chr8 | 37221664  | 42322860  | 1 | 0 | 0 | 57  |
| 79 | chr8 | 61632813  | 64896557  | 1 | 0 | 0 | 55  |
| 80 | chr8 | 71301175  | 71431155  | 1 | 0 | 0 | 1   |

|    |      |           |           |   |   |   |     |
|----|------|-----------|-----------|---|---|---|-----|
| 81 | chr8 | 90964543  | 94385148  | 1 | 0 | 0 | 51  |
| 82 | chr8 | 105466415 | 105566934 | 1 | 0 | 0 | 2   |
| 83 | chr8 | 113063388 | 114015951 | 1 | 0 | 0 | 19  |
| 84 | chr8 | 119830324 | 119832288 | 1 | 0 | 0 | 1   |
| 85 | chr8 | 133152921 | 134822866 | 1 | 0 | 0 | 46  |
| 86 | chr8 | 142114111 | 142915956 | 1 | 0 | 0 | 19  |
| 87 | chr8 | 170308877 | 171403851 | 1 | 0 | 0 | 49  |
| 88 | chr9 | 384383    | 408227    | 1 | 0 | 0 | 0   |
| 89 | chr9 | 20905213  | 21728170  | 0 | 1 | 1 | 14  |
| 90 | chr9 | 24459413  | 30070094  | 1 | 0 | 0 | 130 |
| 91 | chr9 | 110988581 | 110997371 | 1 | 0 | 0 | 1   |
| 92 | chr9 | 120081323 | 120160910 | 1 | 0 | 0 | 2   |
| 93 | chr9 | 147488930 | 147492242 | 0 | 1 | 0 | 1   |
| 94 | chr9 | 149518807 | 149547799 | 1 | 0 | 0 | 6   |

---

**Table S2 Candidate regions under selection during 30 generations of selection for seed size, at the 99.99% level.**

Regions were identified using  $F_{ST}$  values and a 25-single nucleotide polymorphism (SNP) sliding window approach. Comparisons were made between Krug Yellow Dent and KLS\_30, Krug Yellow Dent and KSS\_30, and KLS\_30 and KSS\_30. One indicates a difference and zero indicates no difference for the region.

| Region | Chromosome | Start     | End       | Krug Yellow<br>Dent vs. KLS_30 | Krug Yellow<br>Dent vs. KSS_30 | KLS_30 vs.<br>KSS_30 | Number<br>of Genes<br>in Region |
|--------|------------|-----------|-----------|--------------------------------|--------------------------------|----------------------|---------------------------------|
| 1      | chr1       | 26329612  | 26830886  | 1                              | 0                              | 0                    | 13                              |
| 2      | chr1       | 241368710 | 241403853 | 1                              | 0                              | 0                    | 3                               |
| 3      | chr10      | 133216883 | 133233948 | 1                              | 0                              | 0                    | 1                               |
| 4      | chr2       | 67171728  | 71897890  | 0                              | 1                              | 1                    | 43                              |
| 5      | chr2       | 81659356  | 88321220  | 0                              | 1                              | 1                    | 57                              |
| 6      | chr2       | 133888415 | 140323700 | 0                              | 1                              | 1                    | 71                              |
| 7      | chr2       | 149509536 | 149793812 | 0                              | 1                              | 0                    | 3                               |
| 8      | chr3       | 35626227  | 35655007  | 1                              | 0                              | 0                    | 0                               |
| 9      | chr4       | 33053660  | 33128631  | 0                              | 1                              | 1                    | 3                               |
| 10     | chr4       | 46050068  | 46061870  | 0                              | 1                              | 0                    | 0                               |
| 11     | chr4       | 121594579 | 121609805 | 0                              | 0                              | 1                    | 1                               |
| 12     | chr4       | 124305534 | 124320863 | 0                              | 1                              | 0                    | 0                               |
| 13     | chr5       | 160954183 | 160971691 | 0                              | 0                              | 1                    | 0                               |
| 14     | chr6       | 74962790  | 75080845  | 1                              | 0                              | 0                    | 2                               |
| 15     | chr6       | 104456206 | 104843865 | 1                              | 0                              | 0                    | 7                               |
| 16     | chr6       | 111761479 | 111767828 | 1                              | 0                              | 0                    | 1                               |
| 17     | chr6       | 118702716 | 119665910 | 1                              | 0                              | 0                    | 15                              |
| 18     | chr6       | 149827936 | 149835542 | 1                              | 0                              | 0                    | 1                               |
| 19     | chr6       | 160589531 | 160606591 | 1                              | 0                              | 0                    | 3                               |
| 20     | chr7       | 9901060   | 11800787  | 0                              | 0                              | 1                    | 38                              |
| 21     | chr8       | 37229750  | 39230104  | 1                              | 0                              | 0                    | 24                              |
| 22     | chr8       | 113178318 | 114007931 | 1                              | 0                              | 0                    | 16                              |
| 23     | chr9       | 20905875  | 20973896  | 0                              | 0                              | 1                    | 3                               |

**Table S3** Number of base pairs in the 2.1Gb maize v2 reference assembly with a given coverage range for each of the population pools. M=million.

| Coverage | Population       |        |        |
|----------|------------------|--------|--------|
|          | Krug Yellow Dent | KLS_30 | KSS_30 |
| 0        | 759M             | 859M   | 792M   |
| 1-5      | 523M             | 568M   | 447M   |
| 6-10     | 219M             | 225M   | 183M   |
| 11-15    | 144M             | 143M   | 127M   |
| 15-20    | 106M             | 99M    | 100M   |
| 21-25    | 81M              | 68M    | 82M    |
| 26-30    | 63M              | 45M    | 69M    |
| 31-40    | 86M              | 43M    | 105M   |
| 41-50    | 47M              | 12M    | 70M    |
| >51      | 37M              | 4M     | 89M    |



**Table S4 Genes within candidate regions under selection at the 99.9% level that were in a gene coexpression network module that distinguished KLS\_30 and KSS\_30 derived inbred lines and was enriched with cell cycle genes.**

| Chr  | Start     | End       | 99.9%<br>Level<br>Region | Krug Yellow<br>Dent vs.<br>KLS_30 | Krug Yellow<br>Dent vs.<br>KSS_30 | KLS_30<br>vs.<br>KSS_30 | Gene in<br>Coexpression<br>Module |
|------|-----------|-----------|--------------------------|-----------------------------------|-----------------------------------|-------------------------|-----------------------------------|
| chr1 | 198652274 | 203086089 | 7                        | 1                                 | 0                                 | 0                       | GRMZM2G055968                     |
| chr1 | 260539402 | 263706680 | 11                       | 1                                 | 0                                 | 0                       | GRMZM2G351304                     |
| chr2 | 79033475  | 88346653  | 21                       | 0                                 | 1                                 | 1                       | GRMZM2G177596                     |
| chr2 | 104374659 | 107211278 | 22                       | 0                                 | 0                                 | 1                       | GRMZM2G141814                     |
| chr2 | 133138750 | 149941557 | 26                       | 1                                 | 1                                 | 1                       | GRMZM2G006765                     |
| chr2 | 133138750 | 149941557 | 26                       | 1                                 | 1                                 | 1                       | GRMZM2G042897                     |
| chr4 | 70497566  | 74434332  | 41                       | 1                                 | 0                                 | 1                       | GRMZM2G147756                     |
| chr4 | 128919570 | 133670654 | 45                       | 1                                 | 0                                 | 0                       | GRMZM2G087323                     |
| chr6 | 118700694 | 119737122 | 65                       | 1                                 | 0                                 | 0                       | GRMZM2G159953                     |
| chr6 | 160413038 | 165284918 | 71                       | 1                                 | 0                                 | 0                       | GRMZM2G096389                     |
| chr6 | 160413038 | 165284918 | 71                       | 1                                 | 0                                 | 0                       | GRMZM2G310758                     |
| chr6 | 160413038 | 165284918 | 71                       | 1                                 | 0                                 | 0                       | GRMZM5G892879                     |
| chr7 | 9710307   | 13889417  | 72                       | 0                                 | 1                                 | 1                       | GRMZM2G101036                     |
| chr7 | 9710307   | 13889417  | 72                       | 0                                 | 1                                 | 1                       | GRMZM2G446921                     |
| chr7 | 146699976 | 148403614 | 75                       | 1                                 | 0                                 | 0                       | AC196961.2_FG003                  |
| chr8 | 37221664  | 42322860  | 78                       | 1                                 | 0                                 | 0                       | GRMZM2G120202                     |
| chr8 | 170308877 | 171403851 | 87                       | 1                                 | 0                                 | 0                       | GRMZM2G069078                     |
| chr9 | 24459413  | 30070094  | 90                       | 1                                 | 0                                 | 0                       | GRMZM2G050329                     |
| chr9 | 24459413  | 30070094  | 90                       | 1                                 | 0                                 | 0                       | GRMZM2G136838                     |

**Table S5 Regions with copy number variation (CNV) between KLS\_30 and KSS\_30 based on read depth variation.** Average read depth was determined in 5kb windows in both populations. CNV windows were defined as having an absolute value greater than 2 for the number of standard deviations (SD) away from the mean in KLS\_30 minus the number of standard deviations away from the mean in KSS\_30.

| Chr | Region Start | Region Stop | Krug Yellow<br>Dent SD From<br>Mean | KLS_30<br>SD from<br>Mean | KSS_30 SD<br>From<br>Mean | Absolute Value of<br>KLS_30 SD Minus<br>KSS_30 SD |
|-----|--------------|-------------|-------------------------------------|---------------------------|---------------------------|---------------------------------------------------|
| 1   | 235001       | 240000      | 6.20                                | 3.54                      | 5.81                      | 2.27                                              |
| 1   | 203910001    | 203915000   | 32.13                               | 36.10                     | 29.50                     | 6.60                                              |
| 1   | 234470001    | 234475000   | 9.85                                | 6.52                      | 8.83                      | 2.31                                              |
| 1   | 234500001    | 234505000   | 8.74                                | 5.46                      | 8.02                      | 2.56                                              |
| 1   | 234510001    | 234515000   | 10.74                               | 6.57                      | 9.38                      | 2.81                                              |
| 1   | 234525001    | 234530000   | 6.38                                | 3.88                      | 6.34                      | 2.46                                              |
| 1   | 234545001    | 234550000   | 2.00                                | 7.27                      | 0.28                      | 6.99                                              |
| 1   | 234605001    | 234610000   | 19.13                               | 13.87                     | 16.02                     | 2.15                                              |
| 1   | 234640001    | 234645000   | 11.68                               | 6.30                      | 10.07                     | 3.76                                              |
| 1   | 234645001    | 234650000   | 23.55                               | 10.47                     | 20.49                     | 10.02                                             |
| 1   | 234650001    | 234655000   | 4.62                                | 1.99                      | 4.03                      | 2.04                                              |
| 1   | 234720001    | 234725000   | 30.96                               | 17.98                     | 26.04                     | 8.05                                              |
| 1   | 234725001    | 234730000   | 32.95                               | 19.19                     | 27.93                     | 8.74                                              |
| 1   | 234730001    | 234735000   | 26.88                               | 15.52                     | 22.49                     | 6.97                                              |
| 1   | 234735001    | 234740000   | 22.14                               | 13.38                     | 18.65                     | 5.27                                              |
| 2   | 65000001     | 65005000    | 9.96                                | 11.93                     | 9.33                      | 2.60                                              |
| 2   | 77820001     | 77825000    | 9.52                                | 5.09                      | 8.19                      | 3.10                                              |
| 2   | 77825001     | 77830000    | 20.88                               | 9.50                      | 18.85                     | 9.35                                              |
| 2   | 77865001     | 77870000    | 8.97                                | 5.59                      | 7.65                      | 2.06                                              |
| 2   | 77870001     | 77875000    | 24.74                               | 16.35                     | 22.08                     | 5.73                                              |
| 2   | 77875001     | 77880000    | 30.42                               | 18.85                     | 26.10                     | 7.25                                              |
| 2   | 77880001     | 77885000    | 13.41                               | 7.95                      | 11.53                     | 3.57                                              |
| 2   | 172080001    | 172085000   | 31.16                               | 35.19                     | 31.35                     | 3.84                                              |
| 2   | 172085001    | 172090000   | 14.78                               | 9.31                      | 14.01                     | 4.70                                              |
| 2   | 172110001    | 172115000   | 26.79                               | 30.90                     | 25.12                     | 5.78                                              |
| 2   | 172115001    | 172120000   | 53.85                               | 60.10                     | 51.33                     | 8.77                                              |
| 2   | 174415001    | 174420000   | 1.82                                | 5.69                      | -0.06                     | 5.74                                              |
| 3   | 74660001     | 74665000    | 11.29                               | 4.59                      | 9.86                      | 5.27                                              |
| 3   | 209600001    | 209605000   | 5.97                                | 4.05                      | 6.10                      | 2.05                                              |
| 4   | 111670001    | 111675000   | 2.75                                | 9.63                      | 0.53                      | 9.10                                              |
| 4   | 172415001    | 172420000   | 9.54                                | 6.01                      | 9.02                      | 3.01                                              |
| 5   | 189240001    | 189245000   | 7.91                                | 4.43                      | 6.65                      | 2.22                                              |
| 5   | 209940001    | 209945000   | 23.61                               | 24.51                     | 20.82                     | 3.69                                              |
| 5   | 209945001    | 209950000   | 22.73                               | 24.76                     | 19.44                     | 5.32                                              |
| 5   | 209960001    | 209965000   | 3.94                                | 5.56                      | -0.32                     | 5.88                                              |
| 5   | 209990001    | 209995000   | 19.42                               | 22.00                     | 18.48                     | 3.52                                              |
| 5   | 210290001    | 210295000   | 4.68                                | 6.30                      | 4.11                      | 2.18                                              |

|    |           |           |       |       |       |      |
|----|-----------|-----------|-------|-------|-------|------|
| 6  | 20610001  | 20615000  | 7.53  | 6.25  | 8.27  | 2.02 |
| 6  | 60760001  | 60765000  | 9.35  | 11.79 | 8.53  | 3.26 |
| 6  | 104230001 | 104235000 | 17.50 | 12.94 | 16.65 | 3.71 |
| 6  | 160755001 | 160760000 | 10.34 | 7.23  | 9.34  | 2.11 |
| 6  | 160765001 | 160770000 | 68.65 | 72.54 | 63.99 | 8.55 |
| 6  | 160770001 | 160775000 | 33.42 | 27.46 | 30.52 | 3.06 |
| 6  | 160785001 | 160790000 | 12.43 | 5.81  | 11.82 | 6.01 |
| 7  | 18050001  | 18055000  | 9.32  | 11.19 | 8.66  | 2.53 |
| 7  | 44725001  | 44730000  | 25.12 | 29.51 | 22.88 | 6.63 |
| 8  | 80365001  | 80370000  | 8.94  | 5.13  | 8.89  | 3.75 |
| 8  | 97340001  | 97345000  | 1.68  | 1.18  | 3.21  | 2.03 |
| 8  | 97350001  | 97355000  | 2.11  | 1.61  | 3.85  | 2.23 |
| 8  | 146460001 | 146465000 | 9.07  | 10.99 | 8.45  | 2.54 |
| 9  | 6950001   | 6955000   | 21.67 | 14.18 | 17.76 | 3.58 |
| 9  | 6955001   | 6960000   | 17.92 | 11.16 | 15.19 | 4.03 |
| 9  | 57980001  | 57985000  | 11.86 | 5.65  | 10.62 | 4.97 |
| 9  | 67980001  | 67985000  | 14.12 | 9.01  | 12.19 | 3.18 |
| 9  | 68025001  | 68030000  | 19.43 | 13.21 | 17.14 | 3.93 |
| 10 | 34105001  | 34110000  | 27.75 | 13.75 | 22.70 | 8.95 |
| 10 | 121000001 | 121005000 | 16.96 | 10.89 | 15.30 | 4.41 |

---

**Tables S6-S7**

Available for download as Excel files at <http://www.genetics.org/lookup/suppl/doi:10.1534/genetics.114.167155/-/DC1>

**Table S6** Comparative genome hybridization (CGH) normalized intensities for four inbreds generated from KLS\_30 and five inbreds generated from KSS\_30.

**Table S7** Joint linkage analysis results for 20-kernel seed weight in the maize nested association mapping (NAM) population.

**Table S8** Single nucleotide polymorphisms (SNPs) contained in a single forward regression genome wide association analysis (GWAS) model for 20-kernel seed weight in the maize nested association mapping (NAM) population. Effect is relative to B73.

| Marker         | chr | AGPv2 Position | cM     | Effect | P value  |
|----------------|-----|----------------|--------|--------|----------|
| PZE0123124739  | 1   | 23,099,268     | 39.91  | -0.07  | 1.11E-16 |
| PZE01201470169 | 1   | 201,639,860    | 115.12 | -0.11  | 1.24E-09 |
| PZE01237261221 | 1   | 237,965,327    | 140.05 | -0.11  | 3.95E-15 |
| PZE0207620470  | 2   | 7,663,333      | 22.98  | -0.06  | 5.77E-17 |
| PZE0219925121  | 2   | 20,005,607     | 50.23  | 0.15   | 1.15E-10 |
| PZE0228682197  | 2   | 28,761,283     | 60.29  | 0.06   | 2.21E-17 |
| PZE02207653607 | 2   | 210,665,344    | 116.70 | 0.11   | 2.08E-09 |
| PZE0305630836  | 3   | 5,850,072      | 21.63  | 0.09   | 1.39E-08 |
| PZE03182929802 | 3   | 184,677,342    | 94.84  | 0.13   | 1.35E-15 |
| PZE03209569396 | 3   | 211,128,687    | 120.01 | -0.16  | 5.34E-13 |
| PZE04207608568 | 4   | 201,957,506    | 108.82 | 0.08   | 2.04E-20 |
| PZE0545748962  | 5   | 46,424,011     | 59.89  | -0.11  | 1.89E-15 |
| PZE05209672404 | 5   | 210,474,175    | 129.99 | 0.25   | 1.87E-13 |
| PZE0692901122  | 6   | 64,157,406     | 19.51  | 0.08   | 2.05E-09 |
| PZE06159136863 | 6   | 159,014,181    | 80.65  | -0.08  | 1.20E-10 |
| PZE07148539524 | 7   | 154,191,204    | 86.44  | 0.09   | 1.15E-08 |
| PZE07156647853 | 7   | 162,259,418    | 99.46  | 0.06   | 4.55E-14 |
| PZE08103597003 | 8   | 104,822,548    | 58.93  | -0.05  | 3.20E-13 |
| PZE0961486830  | 9   | NA             | 45.68  | 0.19   | 4.67E-24 |
| PZE09131782056 | 9   | 136,179,349    | 66.59  | 0.06   | 2.23E-12 |
| PZE1025657301  | 10  | 25,657,714     | 35.72  | -0.09  | 7.26E-10 |

**Table S9 Resampling model inclusion probability (RMIP) analysis results for 20-kernel seed weight in the maize nested association mapping (NAM) population.** Only markers with bootstrap support in five or more subsamples are reported. Effect is relative to B73. The reported *P* values are the lowest significant *P* value that was observed across the 100 subsamples.

| Marker         | Chr | AGPv2 Position | cM     | RMIP | Effect | P value  |
|----------------|-----|----------------|--------|------|--------|----------|
| PZE0122275486  | 1   | 22,247,033     | 39.19  | 16   | -0.12  | 6.15E-13 |
| PZE0123077638  | 1   | 23,067,629     | 39.87  | 11   | -0.07  | 8.38E-13 |
| PZE0123124739  | 1   | 23,099,268     | 39.91  | 16   | -0.07  | 5.61E-12 |
| PZE0123662144  | 1   | 23,566,708     | 40.47  | 25   | -0.07  | 5.02E-11 |
| PZE0125025863  | 1   | 24,931,627     | 41.89  | 8    | -0.08  | 6.15E-13 |
| PZE0139180321  | 1   | 39,111,110     | 57.09  | 5    | 0.07   | 1.51E-09 |
| PZE01201470169 | 1   | 201,639,860    | 115.12 | 9    | -0.12  | 4.18E-09 |
| PZE01233561761 | 1   | 234,219,193    | 138.59 | 39   | -0.14  | 3.91E-11 |
| PZE01237261221 | 1   | 237,965,327    | 140.05 | 40   | -0.11  | 6.16E-11 |
| PZE01292560885 | 1   | 293,627,855    | 192.50 | 12   | -0.06  | 5.79E-10 |
| PZE01292868532 | 1   | 293,935,502    | 193.21 | 5    | -0.05  | 1.81E-09 |
| PZE0205818953  | 2   | 5,817,525      | 17.74  | 8    | -0.07  | 3.99E-11 |
| PZE0207620470  | 2   | 7,663,333      | 22.98  | 48   | -0.06  | 6.57E-11 |
| PZE0207910201  | 2   | 7,953,064      | 23.73  | 9    | -0.07  | 6.71E-11 |
| PZE0219925121  | 2   | 20,005,607     | 50.23  | 18   | 0.16   | 1.84E-09 |
| PZE0221648470  | 2   | 21,726,433     | 52.73  | 6    | 0.09   | 2.99E-09 |
| PZE0228682191  | 2   | 28,761,277     | 60.29  | 6    | 0.07   | 3.63E-11 |
| PZE0228682197  | 2   | 28,761,283     | 60.29  | 14   | 0.07   | 1.54E-13 |
| PZE0229550868  | 2   | 29,117,510     | 61.21  | 6    | 0.06   | 2.48E-10 |
| PZE0235758316  | 2   | 35,272,110     | 64.57  | 9    | 0.08   | 2.81E-14 |
| PZE0238058171  | 2   | 37,572,981     | 66.09  | 6    | 0.07   | 5.49E-16 |
| PZE0239176813  | 2   | 38,696,485     | 66.82  | 8    | 0.10   | 1.85E-10 |
| PZE0240222660  | 2   | 39,757,715     | 67.51  | 29   | 0.11   | 5.75E-09 |
| PZE0240904916  | 2   | 40,439,971     | 67.94  | 6    | 0.08   | 6.88E-11 |
| PZE02207653607 | 2   | 210,665,344    | 116.70 | 6    | 0.13   | 1.99E-09 |
| PZE0302919491  | 3   | 2,957,042      | 8.69   | 9    | 0.06   | 2.46E-09 |
| PZE0305630836  | 3   | 5,850,072      | 21.63  | 8    | 0.10   | 8.31E-09 |
| PZE03116146291 | 3   | 119,926,252    | 59.37  | 13   | 0.10   | 6.65E-09 |
| PZE03177053561 | 3   | 178,806,797    | 88.27  | 6    | 0.15   | 1.15E-11 |
| PZE03178447133 | 3   | 180,203,027    | 90.04  | 12   | 0.11   | 7.81E-12 |
| PZE03182929802 | 3   | 184,677,342    | 94.84  | 65   | 0.13   | 2.99E-10 |
| PZE03209569396 | 3   | 211,128,687    | 120.01 | 77   | -0.16  | 1.39E-09 |
| PZE04207608568 | 4   | 201,957,506    | 108.82 | 48   | 0.08   | 5.12E-13 |
| PZE04207758758 | 4   | 202,107,696    | 108.86 | 23   | 0.07   | 3.74E-14 |
| PZE04212652195 | 4   | 207,024,058    | 110.04 | 5    | 0.07   | 1.32E-14 |
| PZE0536484165  | 5   | 37,174,222     | 58.23  | 14   | -0.15  | 4.28E-12 |
| PZE0545435902  | 5   | 46,110,951     | 59.83  | 10   | -0.15  | 1.70E-10 |
| PZE0545748962  | 5   | 46,424,011     | 59.89  | 21   | -0.11  | 6.11E-12 |

|                |    |             |        |    |       |          |
|----------------|----|-------------|--------|----|-------|----------|
| PZE0566973506  | 5  | 67,673,484  | 64.68  | 6  | -0.08 | 1.42E-11 |
| PZE0567955527  | 5  | 68,647,181  | 64.90  | 6  | -0.13 | 5.99E-13 |
| PZE0570378999  | 5  | 71,092,575  | 65.73  | 9  | -0.11 | 6.41E-12 |
| PZE05209219847 | 5  | 210,021,618 | 128.36 | 9  | 0.18  | 8.04E-11 |
| PZE05209416262 | 5  | 210,218,033 | 129.07 | 8  | 0.26  | 5.92E-11 |
| PZE05209450970 | 5  | 210,252,741 | 129.19 | 5  | 0.26  | 1.84E-10 |
| PZE05209890414 | 5  | 210,694,868 | 130.78 | 14 | 0.19  | 1.00E-10 |
| PZE05212784052 | 5  | 213,583,963 | 142.19 | 20 | 0.19  | 8.37E-11 |
| PZE05213906088 | 5  | 214,718,607 | 147.42 | 11 | 0.19  | 5.70E-10 |
| PZE0690543233  | 6  | 91,646,020  | 17.51  | 7  | 0.08  | 4.93E-09 |
| PZE0692901122  | 6  | 64,157,406  | 19.51  | 12 | 0.10  | 5.92E-09 |
| PZE0696785554  | 6  | 96,541,043  | 22.94  | 6  | 0.15  | 1.08E-08 |
| PZE06159136863 | 6  | 159,014,181 | 80.65  | 19 | -0.08 | 6.37E-09 |
| PZE06163919721 | 6  | 163,822,182 | 95.67  | 35 | -0.09 | 5.30E-09 |
| PZE07148539524 | 7  | 154,191,204 | 86.44  | 34 | 0.10  | 1.64E-08 |
| PZE07156061393 | 7  | 161,697,119 | 98.24  | 6  | 0.09  | 1.04E-12 |
| PZE07156647853 | 7  | 162,259,418 | 99.46  | 22 | 0.08  | 2.07E-10 |
| PZE07157275574 | 7  | 162,985,624 | 100.76 | 18 | 0.09  | 6.83E-12 |
| PZE07158131612 | 7  | 163,824,440 | 102.53 | 13 | 0.08  | 1.03E-11 |
| PZE07160221189 | 7  | 165,945,883 | 107.21 | 13 | 0.06  | 5.46E-10 |
| PZE07168993370 | 7  | 174,761,756 | 134.00 | 5  | 0.20  | 5.90E-09 |
| PZE0801360932  | 8  | 1,375,719   | 2.97   | 9  | -0.13 | 1.11E-08 |
| PZE0832831580  | 8  | 32,859,653  | 51.21  | 5  | -0.07 | 8.73E-12 |
| PZE08103155726 | 8  | 104,380,896 | 58.78  | 12 | -0.06 | 6.77E-11 |
| PZE08103597003 | 8  | 104,822,548 | 58.93  | 12 | -0.06 | 5.10E-11 |
| PZE08109869427 | 8  | 111,192,862 | 60.88  | 9  | -0.06 | 7.05E-12 |
| PZE08112249901 | 8  | 113,634,215 | 61.49  | 7  | -0.06 | 3.90E-11 |
| PZE08156324673 | 8  | 157,638,136 | 83.03  | 6  | -0.06 | 6.12E-11 |
| PZE0961486830  | 9  | NA          | 45.68  | 56 | 0.19  | 1.76E-15 |
| PZE0985093978  | 9  | 88,002,312  | 46.49  | 5  | 0.22  | 9.81E-11 |
| PZE0986885631  | 9  | 89,813,289  | 46.80  | 19 | 0.20  | 2.14E-13 |
| PZE0988184281  | 9  | 91,122,357  | 47.01  | 6  | 0.20  | 3.83E-19 |
| PZE09131781985 | 9  | 136,179,278 | 66.59  | 9  | 0.06  | 2.98E-09 |
| PZE09131782056 | 9  | 136,179,349 | 66.59  | 9  | 0.06  | 3.98E-09 |
| PZE09137421592 | 9  | 141,828,934 | 76.37  | 5  | 0.08  | 9.82E-09 |
| PZE1025657301  | 10 | 25,657,714  | 35.72  | 25 | -0.09 | 1.44E-08 |
| PZE1030835021  | 10 | 30,870,720  | 36.00  | 17 | -0.09 | 1.38E-08 |
| PZE1036843968  | 10 | 52,676,288  | 36.08  | 6  | -0.07 | 1.21E-08 |
