# Supplementary material
Source: PubMed Central journal article supplement (PMC4174951)
Supplement: 596f58a0ce8a2636a8e606ca5e8225ea_genetics.114.167155-7.pdf [file 596f58a0ce8a2636a8e606ca5e8225ea_genetics.114.167155-7.pdf]

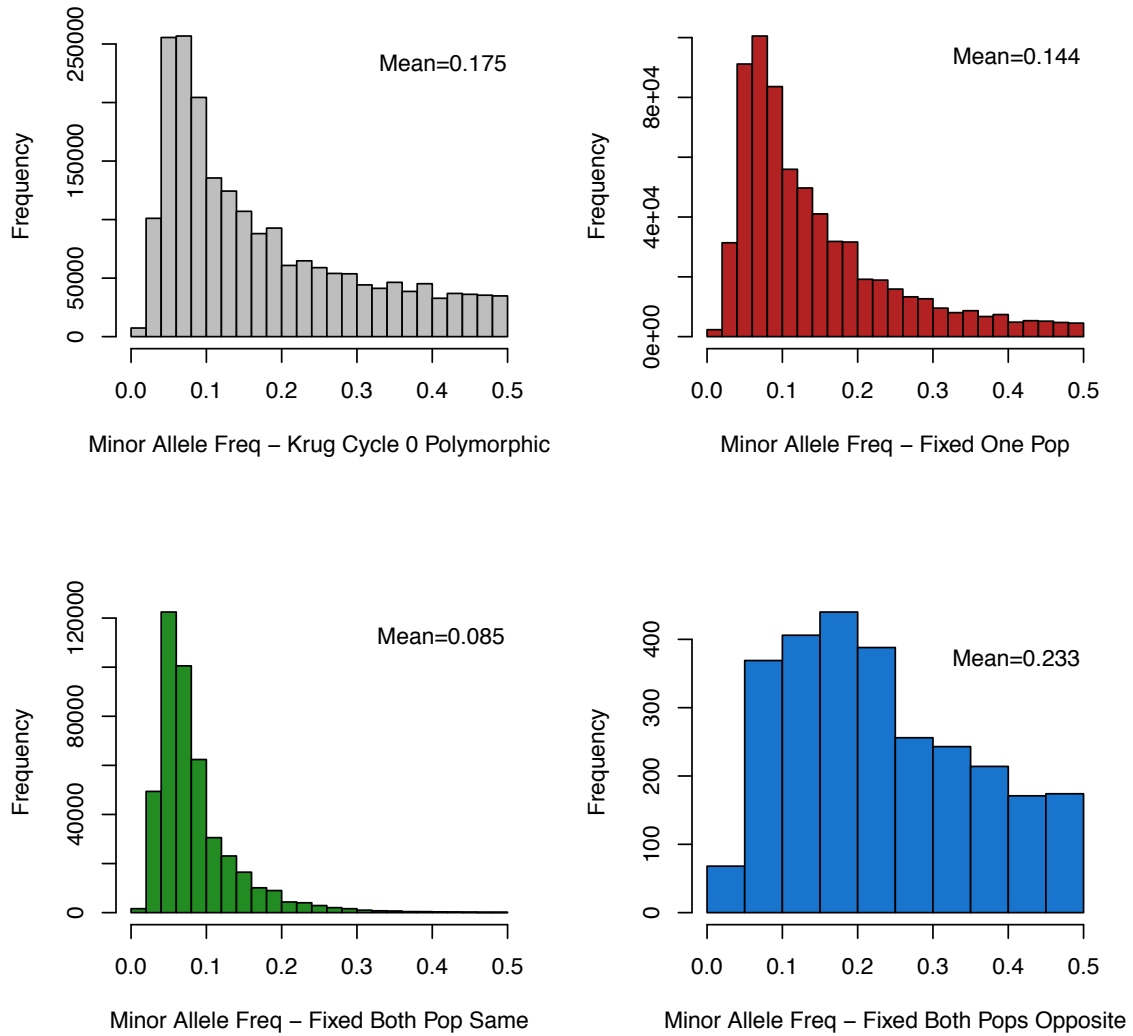

**Figure S6** Empirical minor allele frequency for 2,056,663 SNPs that were polymorphic in the Krug Yellow Dent population and subsets of these SNPs that were fixed in one or both of the selected populations. 664,056 SNPs reached fixation in only one population (red), 444,599 SNPs reached fixation in both populations with the same fixed allele (green), and 2,729 SNPs reads in both populations reached fixation in both populations with oppositely fixed SNPs (blue).
