# Supplementary material
Source: PubMed Central journal article supplement (PMC4174951)
Supplement: 3898e9652aceaa5098590b6e16ed033b_genetics.114.167155-16.pdf [file 3898e9652aceaa5098590b6e16ed033b_genetics.114.167155-16.pdf]

**Table S8** Single nucleotide polymorphisms (SNPs) contained in a single forward regression genome wide association analysis (GWAS) model for 20-kernel seed weight in the maize nested association mapping (NAM) population. Effect is relative to B73.

| Marker         | chr | AGPv2 Position | cM     | Effect | P value  |
|----------------|-----|----------------|--------|--------|----------|
| PZE0123124739  | 1   | 23,099,268     | 39.91  | -0.07  | 1.11E-16 |
| PZE01201470169 | 1   | 201,639,860    | 115.12 | -0.11  | 1.24E-09 |
| PZE01237261221 | 1   | 237,965,327    | 140.05 | -0.11  | 3.95E-15 |
| PZE0207620470  | 2   | 7,663,333      | 22.98  | -0.06  | 5.77E-17 |
| PZE0219925121  | 2   | 20,005,607     | 50.23  | 0.15   | 1.15E-10 |
| PZE0228682197  | 2   | 28,761,283     | 60.29  | 0.06   | 2.21E-17 |
| PZE02207653607 | 2   | 210,665,344    | 116.70 | 0.11   | 2.08E-09 |
| PZE0305630836  | 3   | 5,850,072      | 21.63  | 0.09   | 1.39E-08 |
| PZE03182929802 | 3   | 184,677,342    | 94.84  | 0.13   | 1.35E-15 |
| PZE03209569396 | 3   | 211,128,687    | 120.01 | -0.16  | 5.34E-13 |
| PZE04207608568 | 4   | 201,957,506    | 108.82 | 0.08   | 2.04E-20 |
| PZE0545748962  | 5   | 46,424,011     | 59.89  | -0.11  | 1.89E-15 |
| PZE05209672404 | 5   | 210,474,175    | 129.99 | 0.25   | 1.87E-13 |
| PZE0692901122  | 6   | 64,157,406     | 19.51  | 0.08   | 2.05E-09 |
| PZE06159136863 | 6   | 159,014,181    | 80.65  | -0.08  | 1.20E-10 |
| PZE07148539524 | 7   | 154,191,204    | 86.44  | 0.09   | 1.15E-08 |
| PZE07156647853 | 7   | 162,259,418    | 99.46  | 0.06   | 4.55E-14 |
| PZE08103597003 | 8   | 104,822,548    | 58.93  | -0.05  | 3.20E-13 |
| PZE0961486830  | 9   | NA             | 45.68  | 0.19   | 4.67E-24 |
| PZE09131782056 | 9   | 136,179,349    | 66.59  | 0.06   | 2.23E-12 |
| PZE1025657301  | 10  | 25,657,714     | 35.72  | -0.09  | 7.26E-10 |
