# Supplementary material
Source: PubMed Central journal article supplement (PMC4174951)
Supplement: c6c7be43ea1c4699481b9bb16f97ff78_genetics.114.167155-9.pdf [file c6c7be43ea1c4699481b9bb16f97ff78_genetics.114.167155-9.pdf]

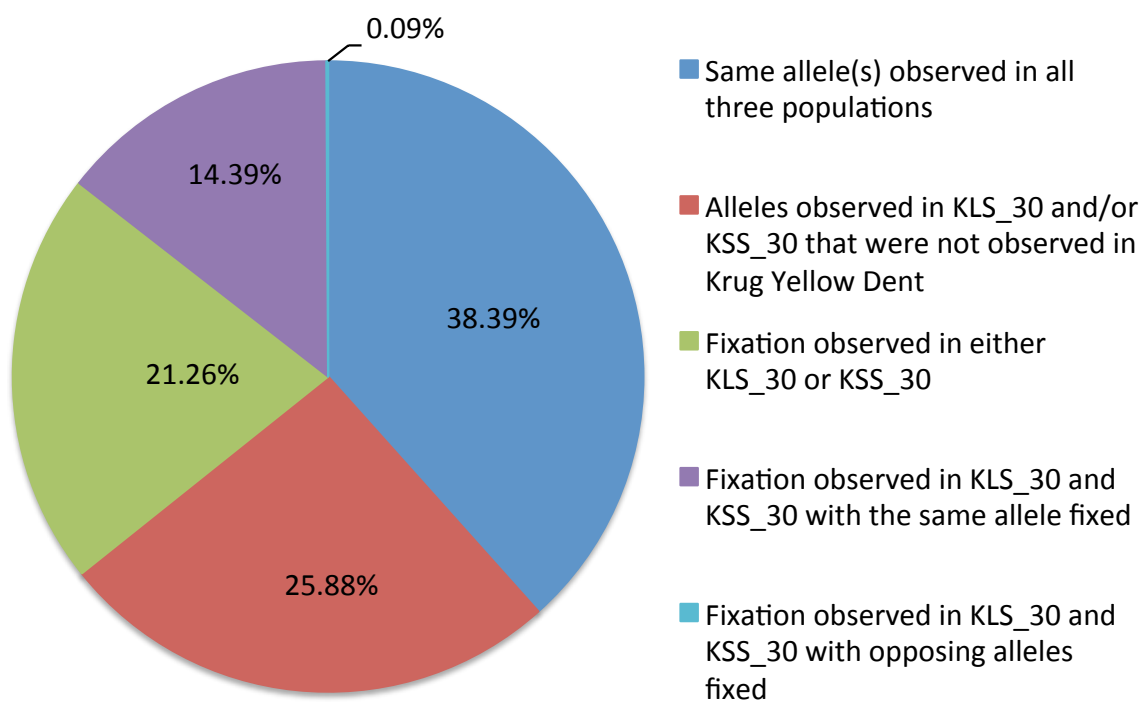

**Figure S1** Categorization of single nucleotide polymorphism (SNP) variants within the populations Krug Yellow Dent, KLS\_30, and KSS\_30.
