# Supplementary material
Source: PubMed Central journal article supplement (PMC4174951)
Supplement: ceba1284dccb4a14338e008579777a15_genetics.114.167155-6.pdf [file ceba1284dccb4a14338e008579777a15_genetics.114.167155-6.pdf]

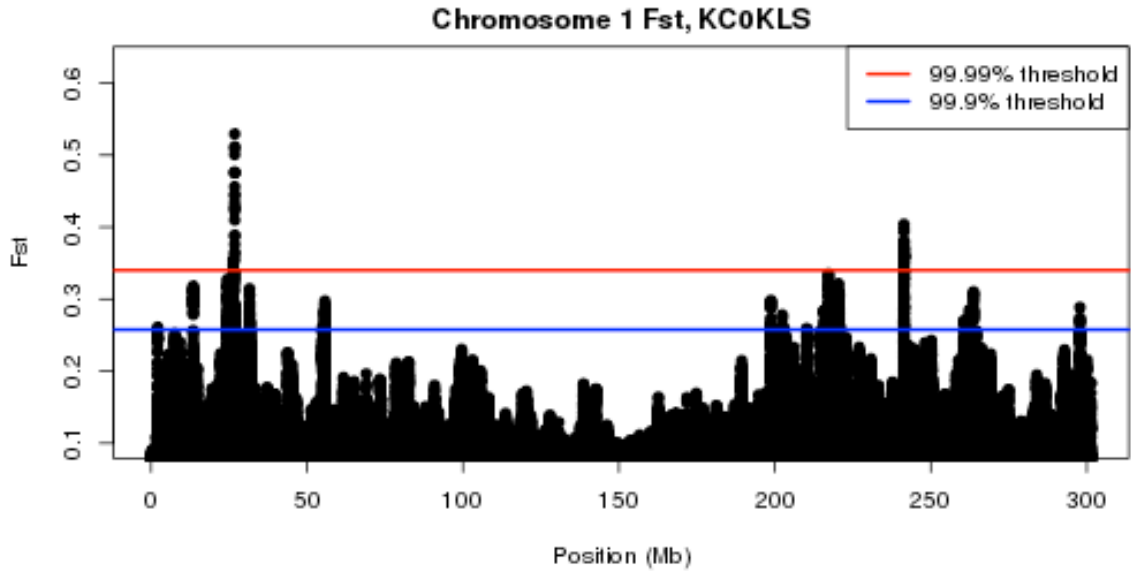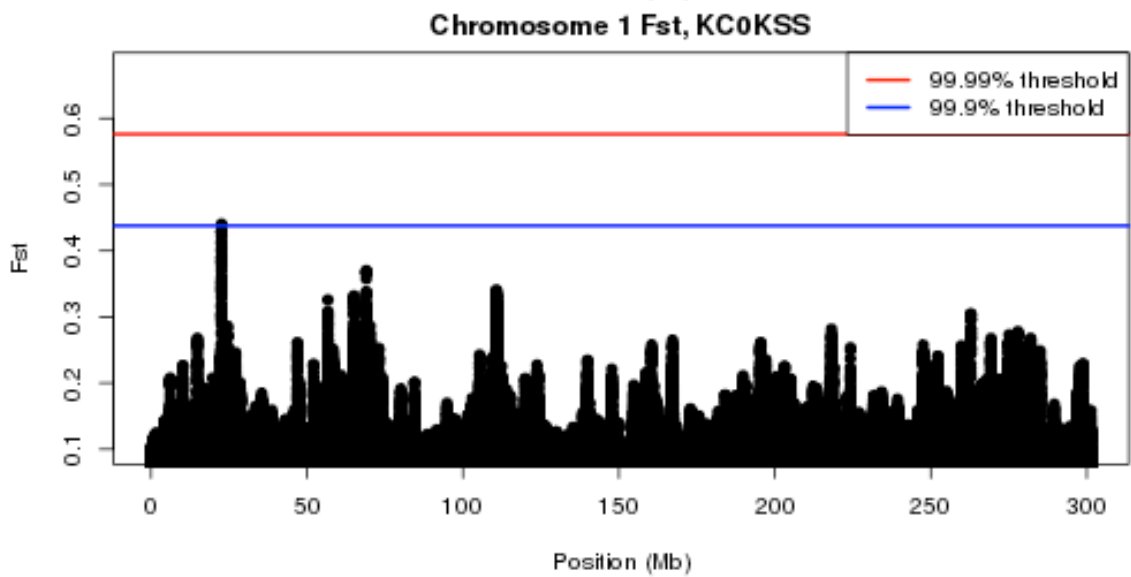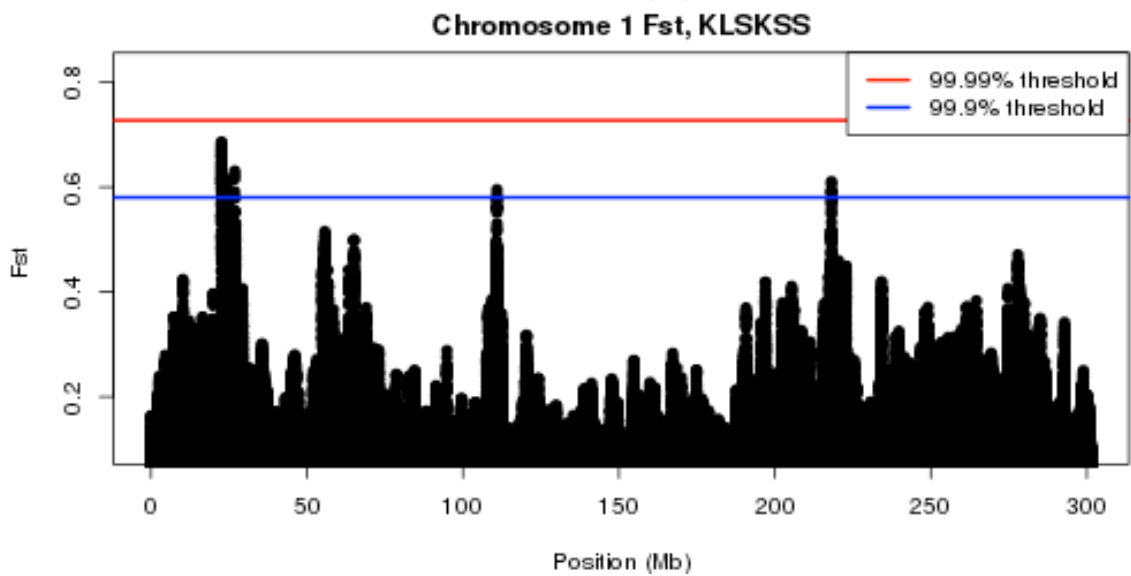

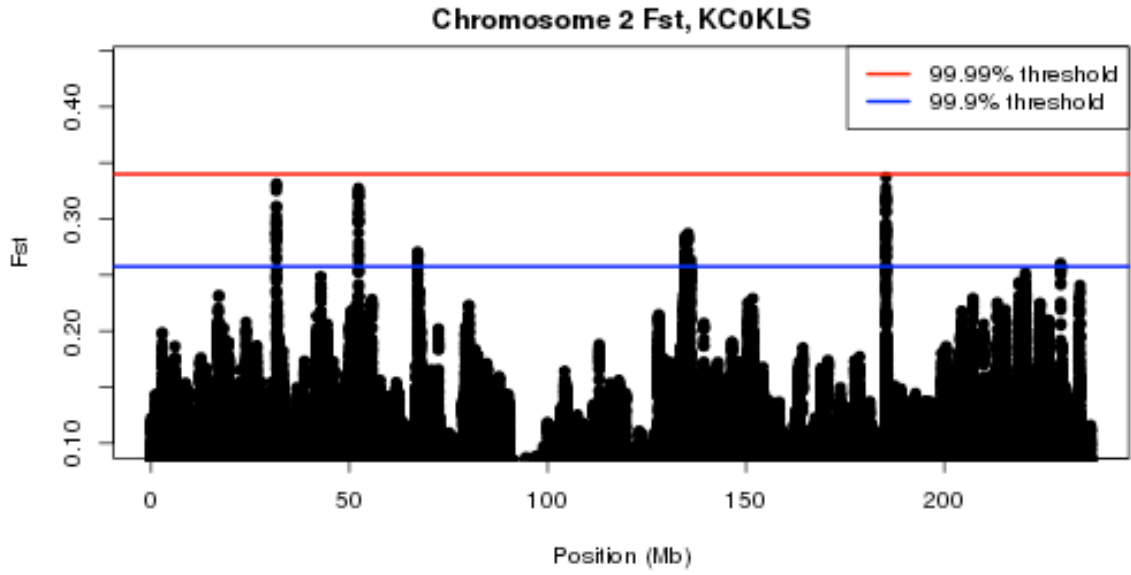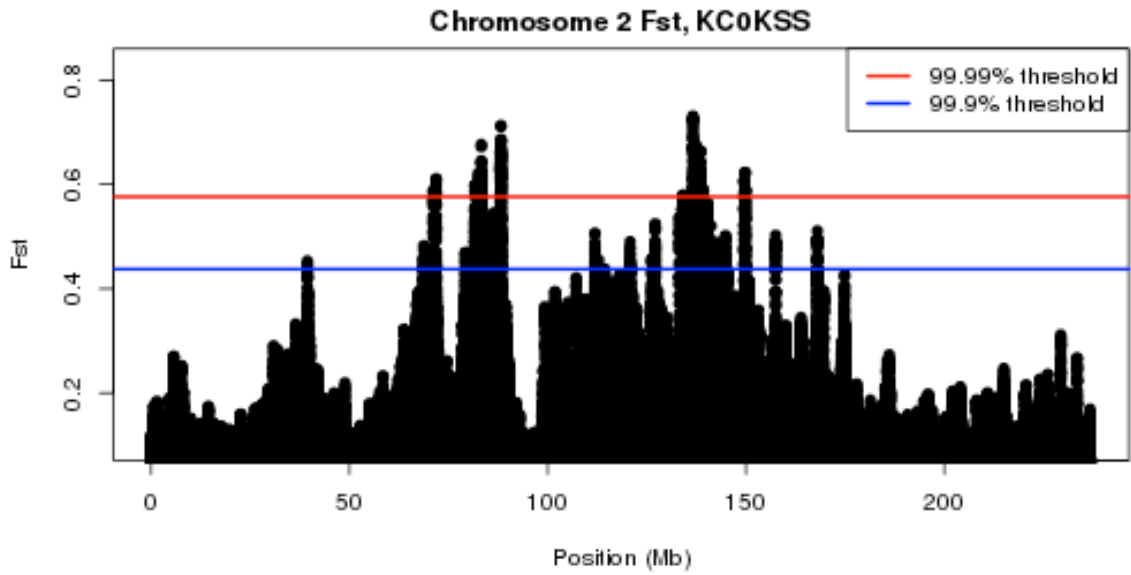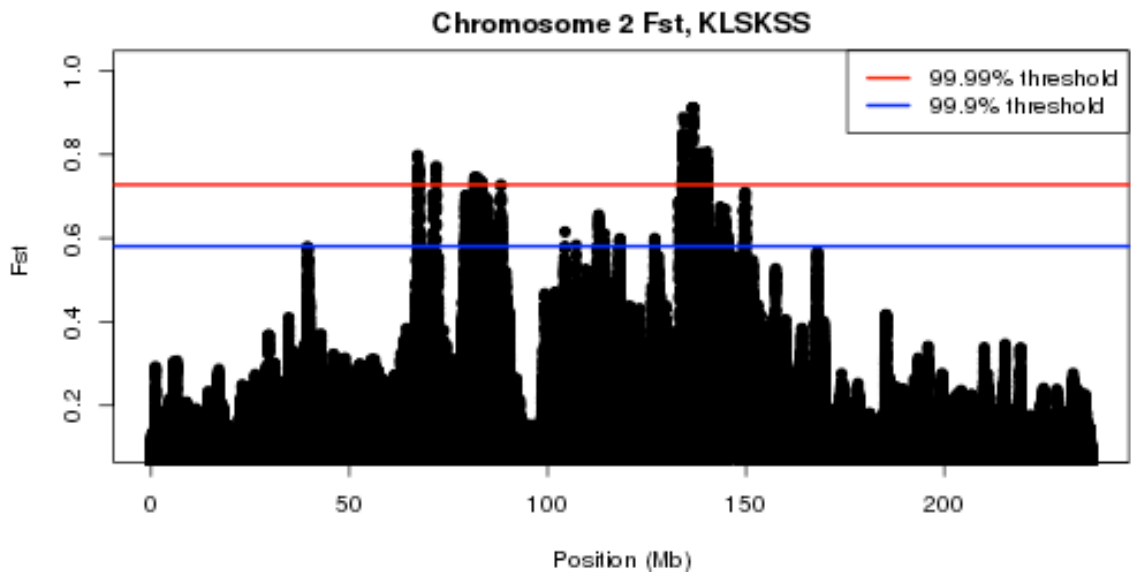

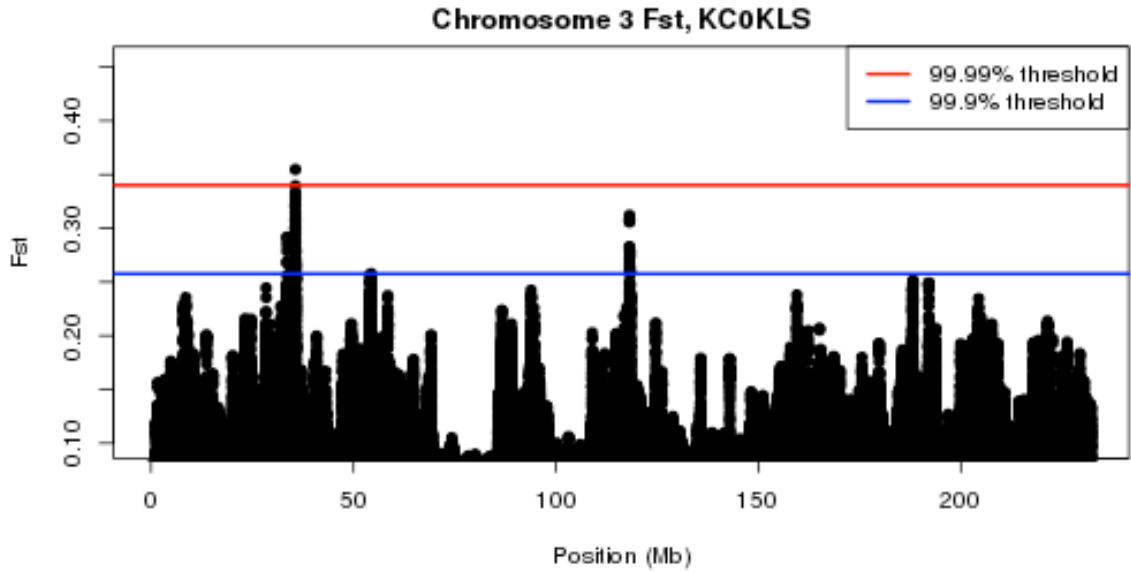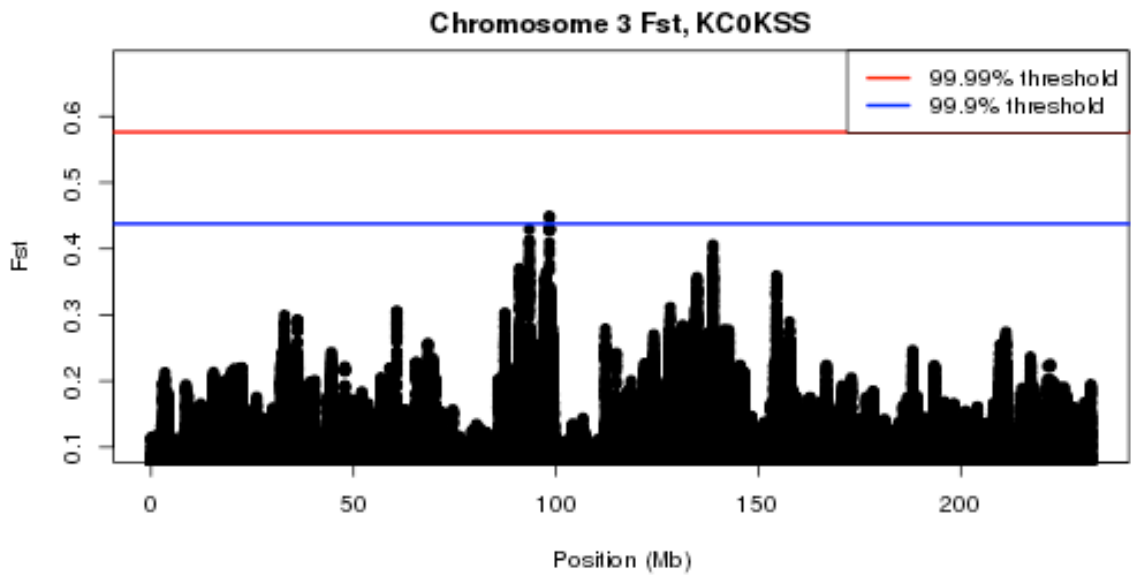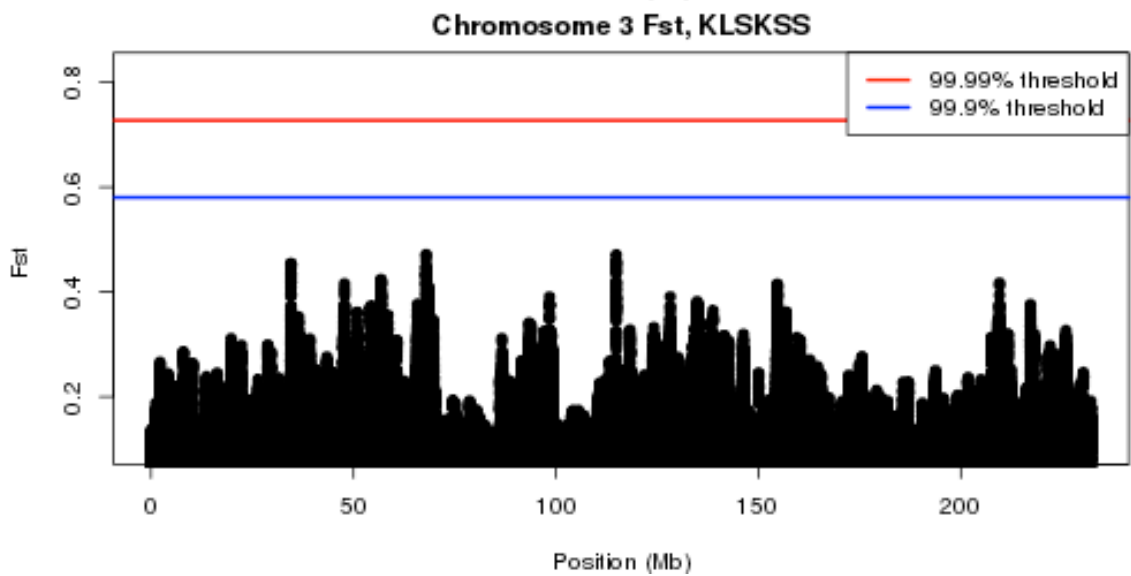

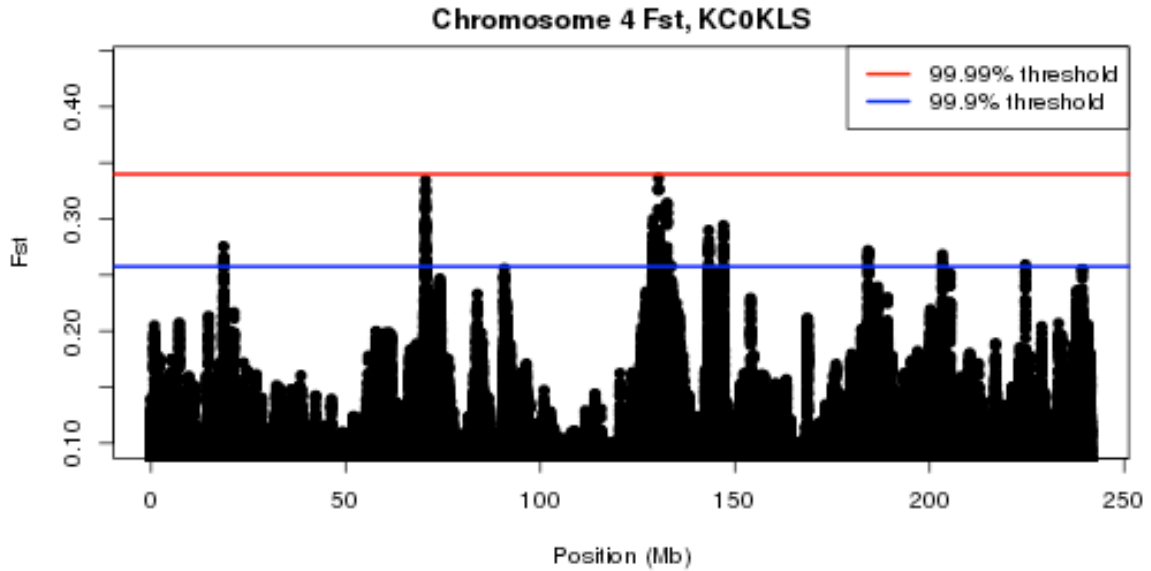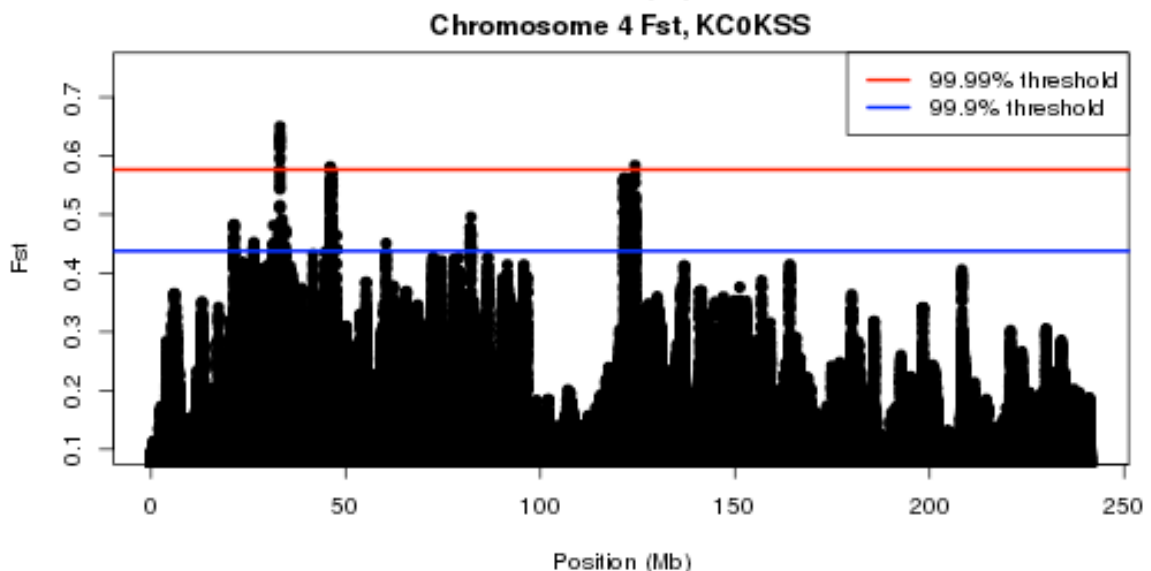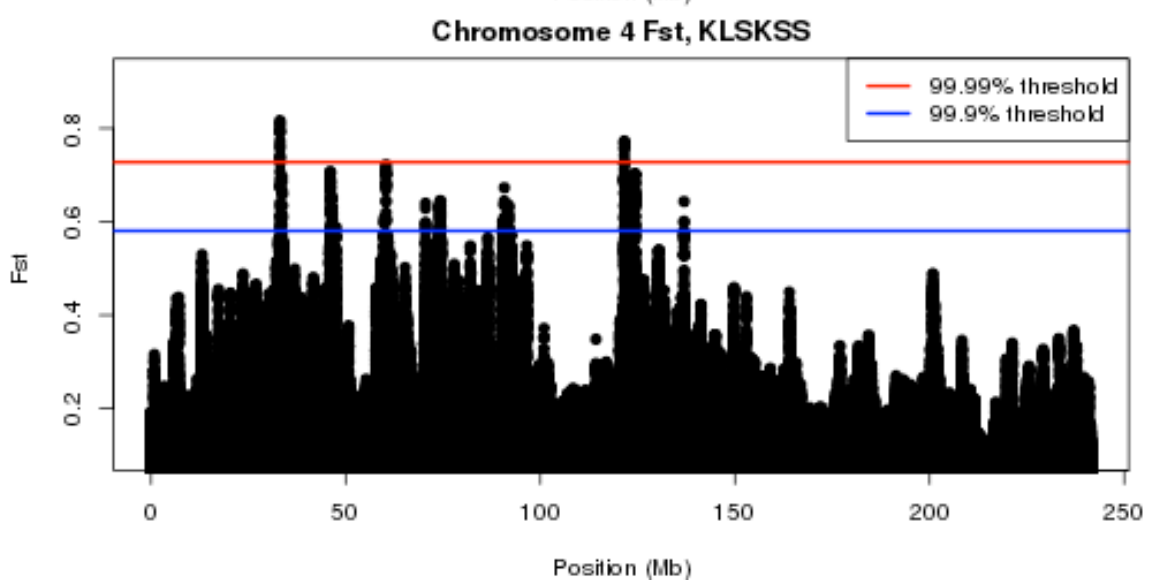

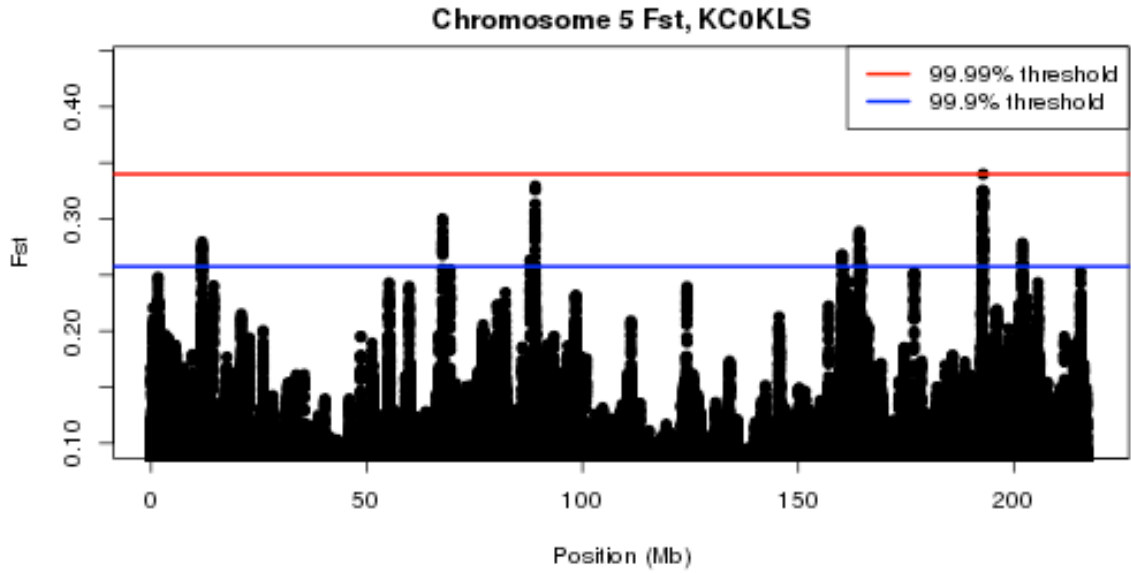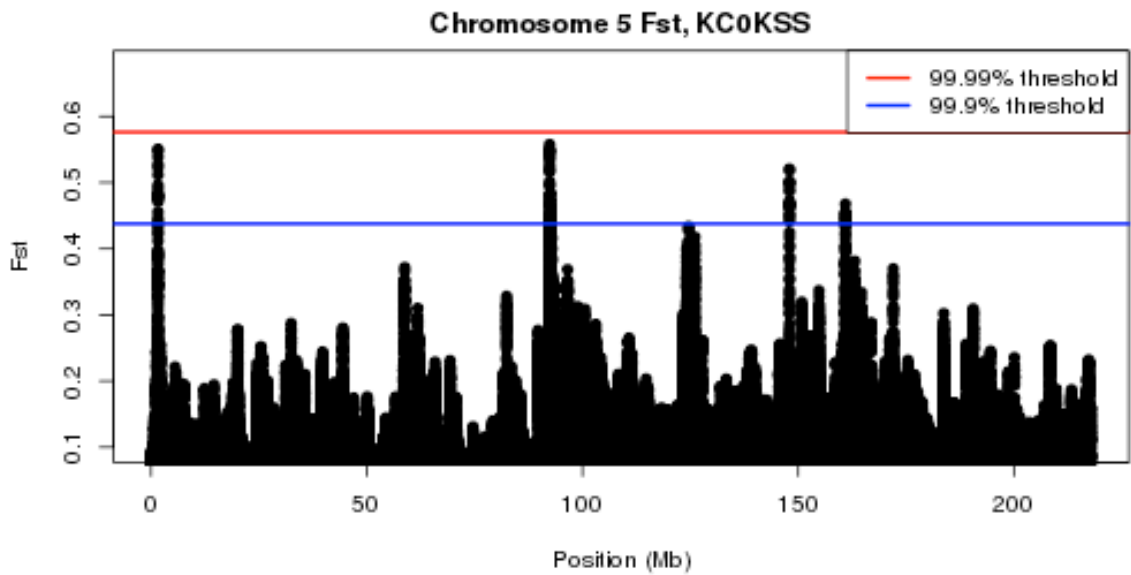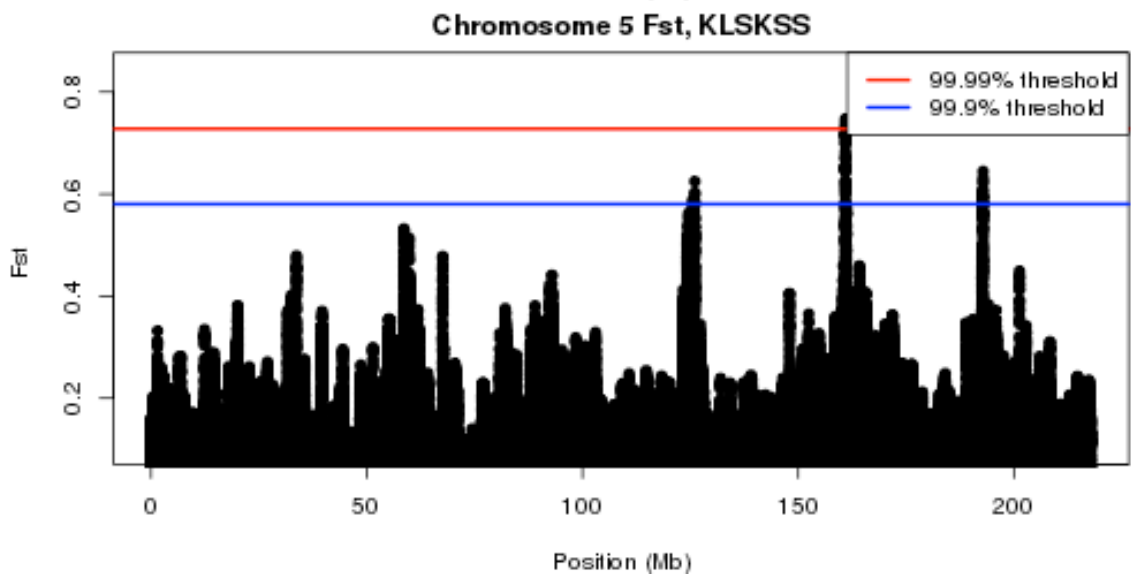

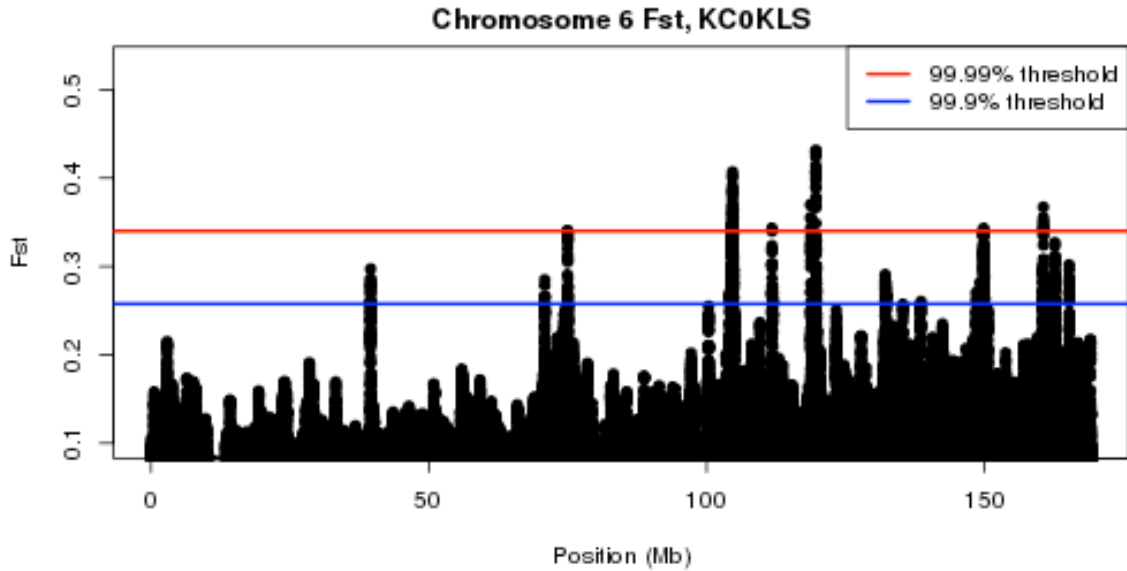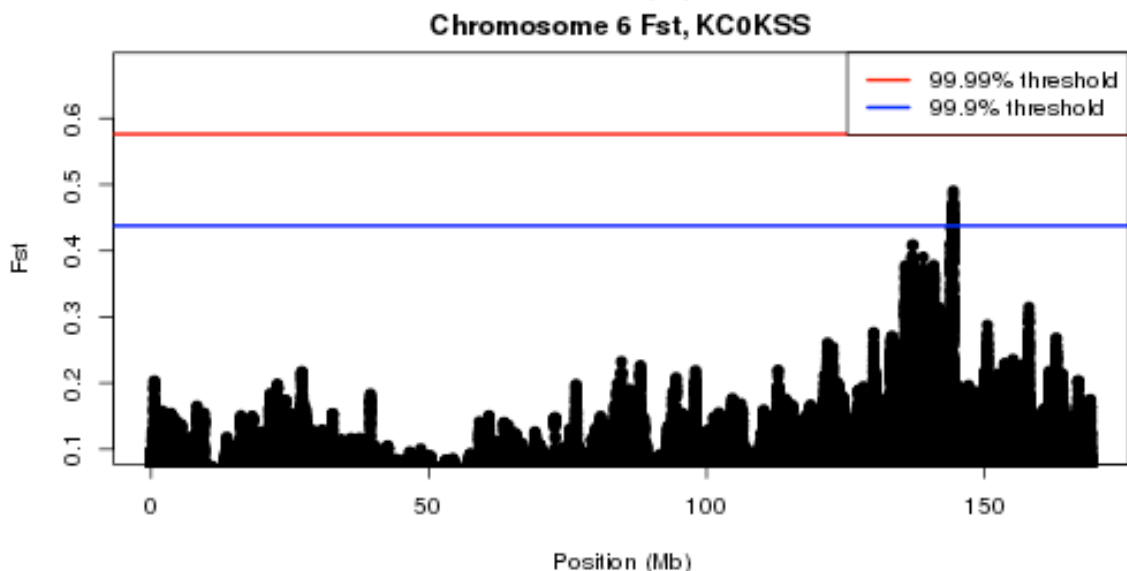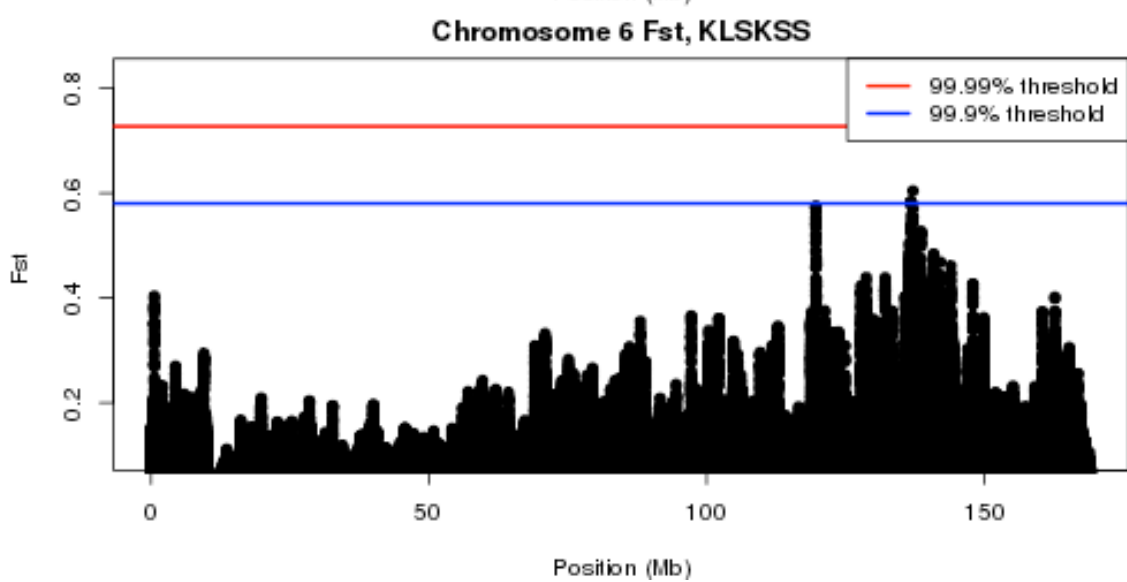

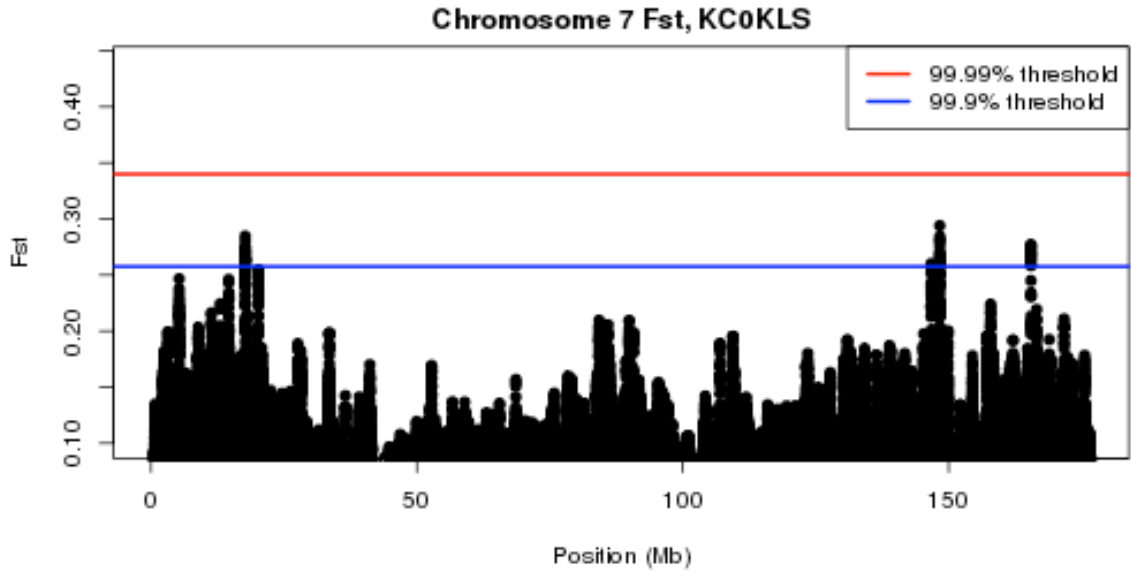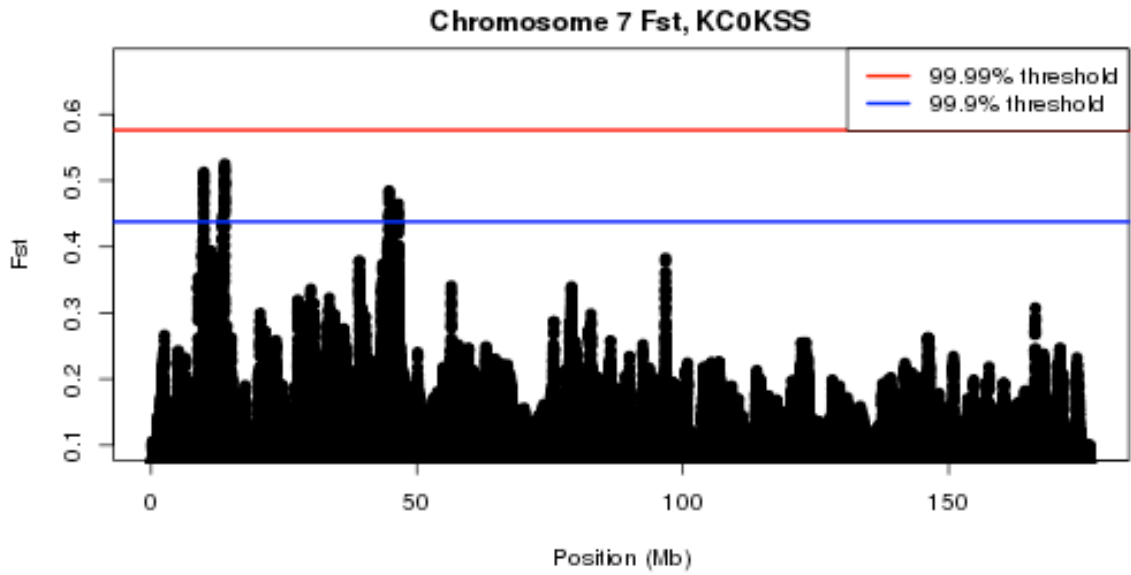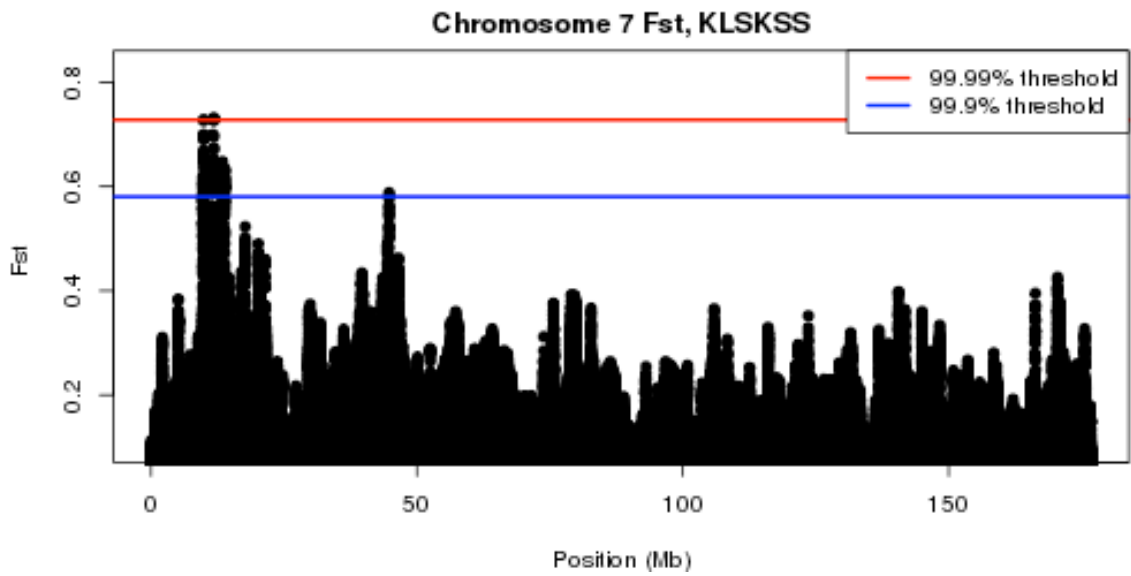

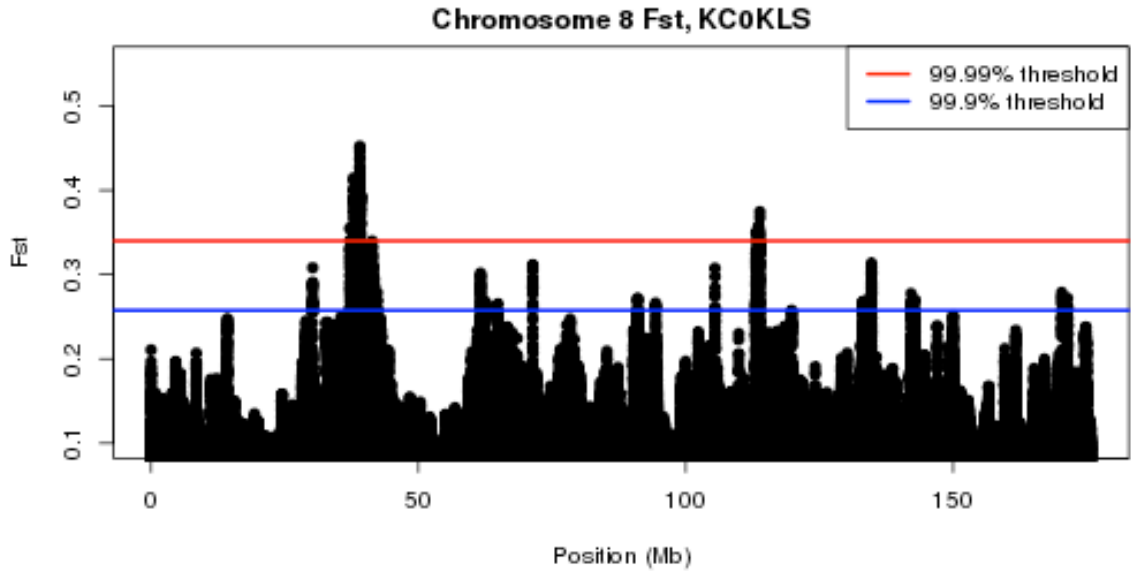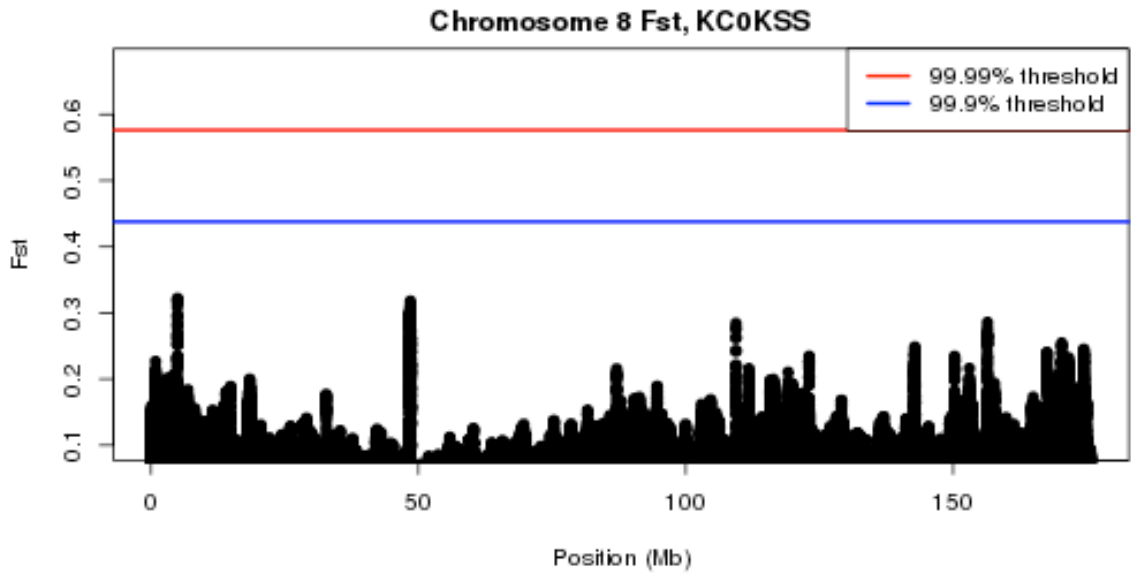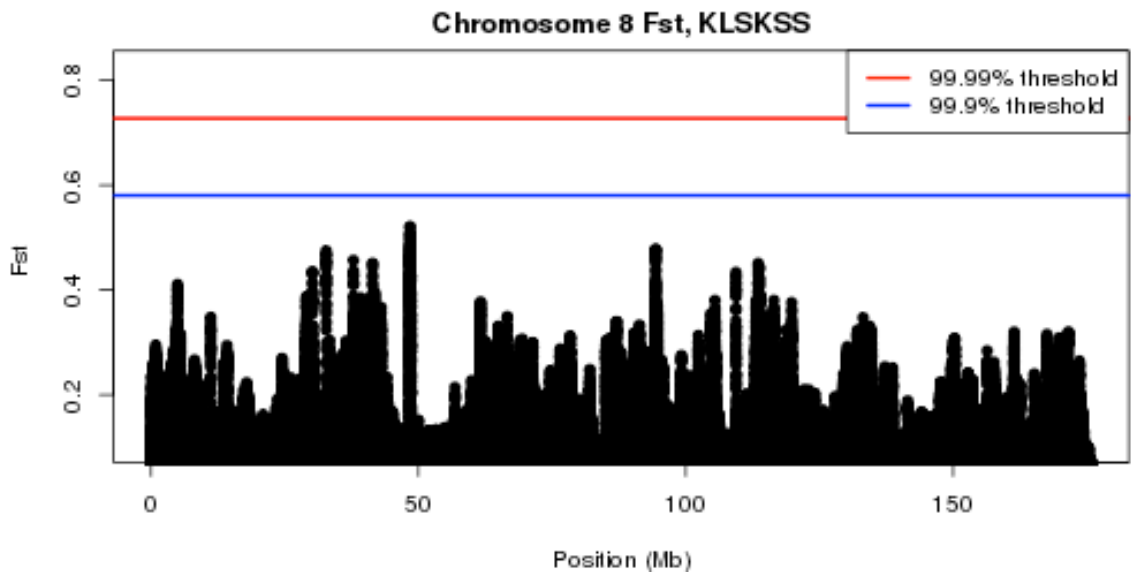



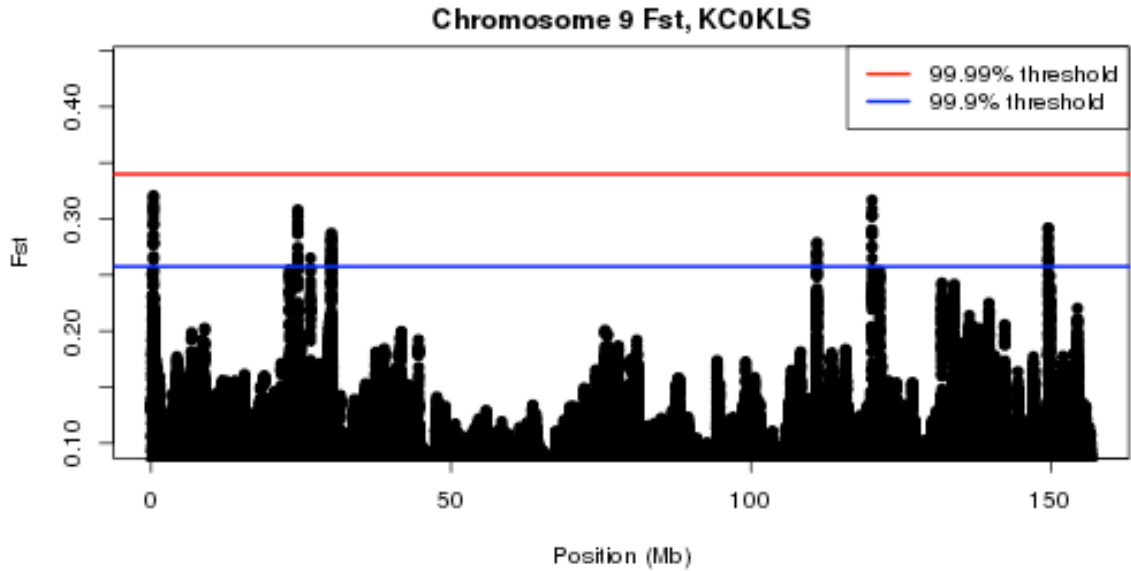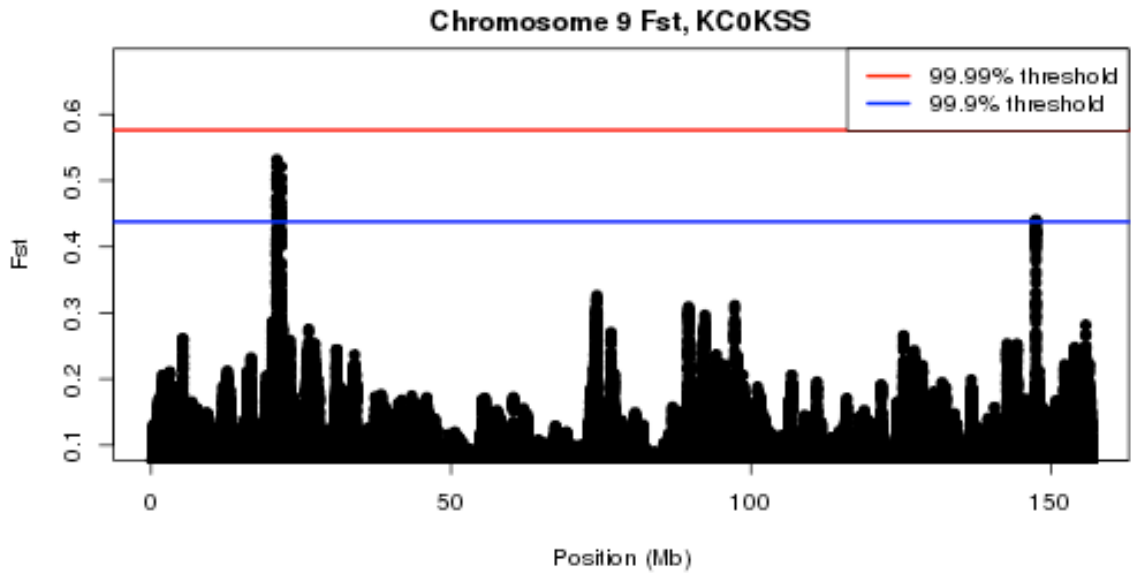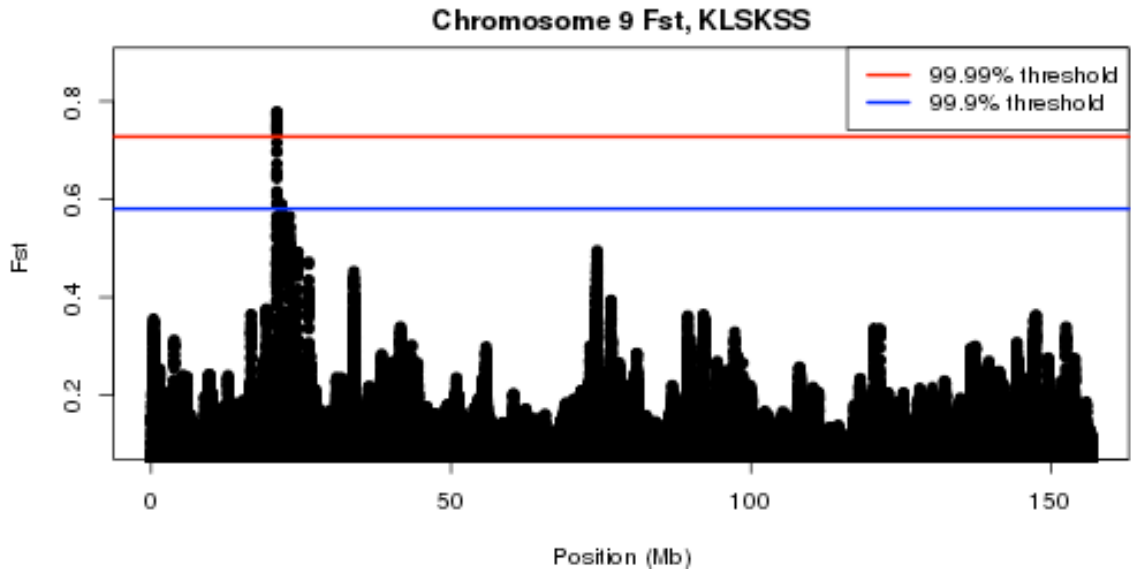

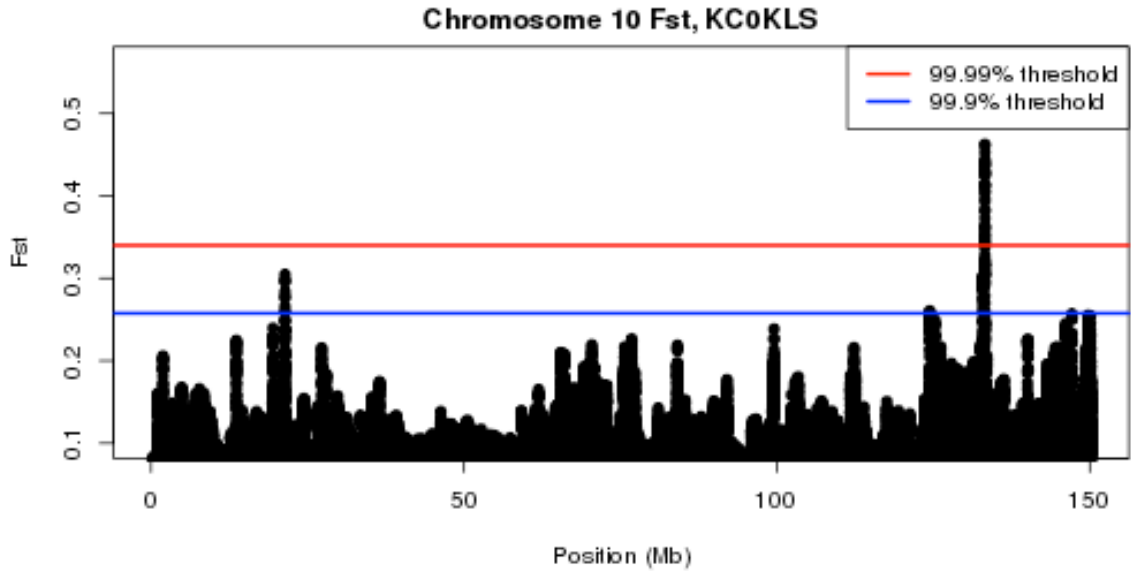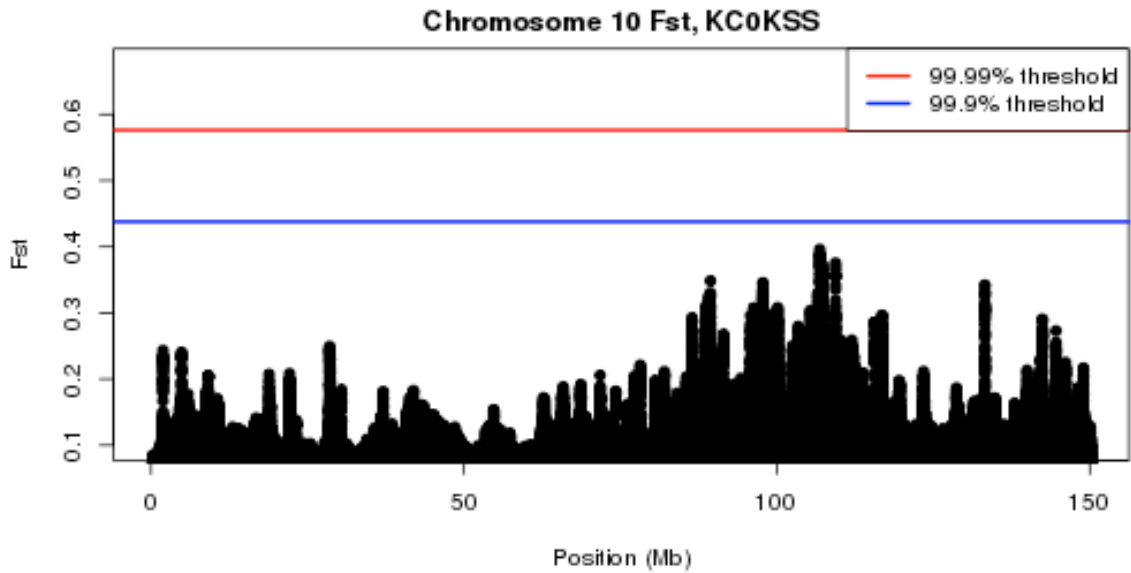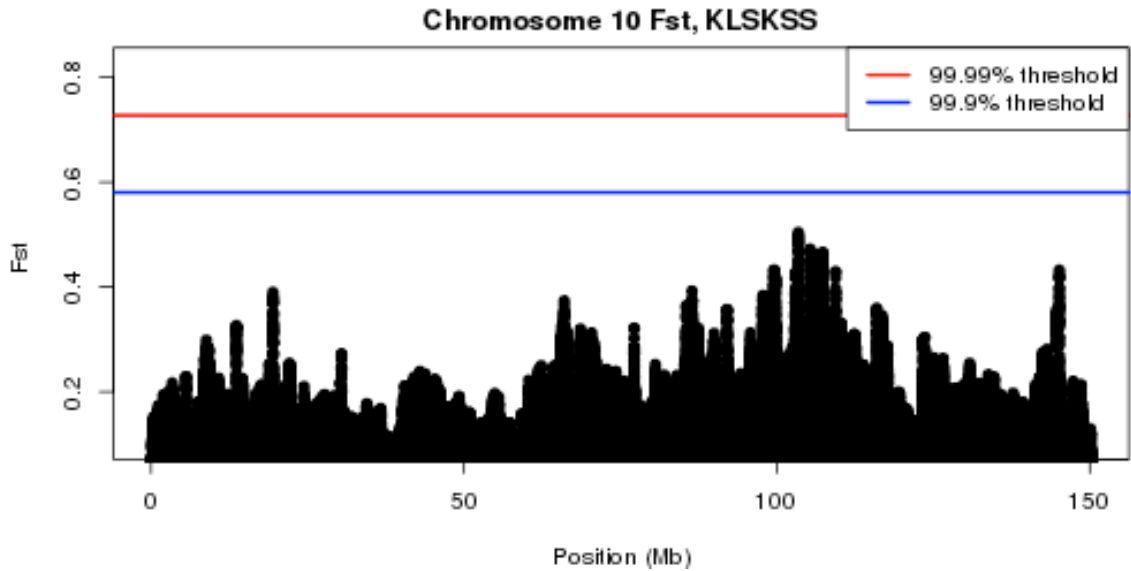

**Figure S2**  $F_{ST}$  values for each of the maize chromosomes.  $F_{ST}$  values were calculated using a 25-single nucleotide polymorphism (SNP) sliding window approach. Comparisons were made between Krug Yellow Dent and KLS\_30, Krug Yellow Dent and KSS\_30, and KLS\_30 and KSS\_30.
