# Supplementary material
Source: PubMed Central journal article supplement (PMC4174951)
Supplement: d1c42789a0db2e5aa8de6bbe5ce791ac_genetics.114.167155-18.pdf [file d1c42789a0db2e5aa8de6bbe5ce791ac_genetics.114.167155-18.pdf]

**Table S3** Number of base pairs in the 2.1Gb maize v2 reference assembly with a given coverage range for each of the population pools. M=million.

| Coverage | Population       |        |        |
|----------|------------------|--------|--------|
|          | Krug Yellow Dent | KLS_30 | KSS_30 |
| 0        | 759M             | 859M   | 792M   |
| 1-5      | 523M             | 568M   | 447M   |
| 6-10     | 219M             | 225M   | 183M   |
| 11-15    | 144M             | 143M   | 127M   |
| 15-20    | 106M             | 99M    | 100M   |
| 21-25    | 81M              | 68M    | 82M    |
| 26-30    | 63M              | 45M    | 69M    |
| 31-40    | 86M              | 43M    | 105M   |
| 41-50    | 47M              | 12M    | 70M    |
| >51      | 37M              | 4M     | 89M    |
