# Supplementary material
Source: PubMed Central journal article supplement (PMC4174951)
Supplement: f3c57e7d05fac19d7f482a387ab9bd7d_genetics.114.167155-5.pdf [file f3c57e7d05fac19d7f482a387ab9bd7d_genetics.114.167155-5.pdf]

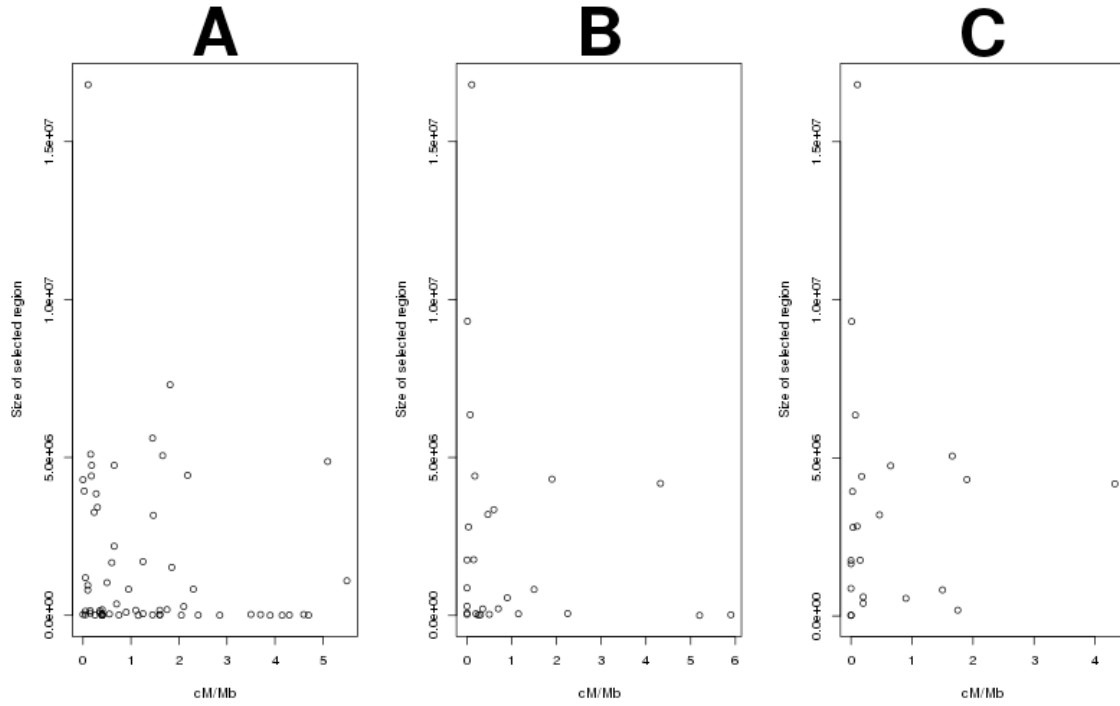

**Figure S3** Region size versus relative recombination rate for each region identified as putatively under selection in the Krug long-term selection populations at the 99.9% outlier threshold. A) Regions identified by comparing Krug Yellow Dent to KLS\_30, B) Regions identified by comparing Krug Yellow Dent to KSS\_30, C) Regions identified by comparing KLS\_30 and KSS\_30. For all, relative levels of recombination across the genome were approximated based on recombination frequencies in the intermated B73 x Mo17 population. No significant correlations were observed.
